# Supplementary material for: The effect of halogenation of salicylaldehyde on the antiproliferative activities of {Δ/Λ-[Ru(bpy)2(X,Y-sal)]BF4} complexes
Source: Royal Society of Chemistry journal article supplement (doi:10.1039/d2dt00401a), 2022-01-01
Supplement: d2dt00401a1.pdf [file d2dt00401a1.pdf]

## Supporting Information

### The effect of halogenation of salicylaldehyde on antiproliferative activities of $\{\Delta/\Lambda\text{-[Ru(bpy)}_2\text{(X,Y-sal)]BF}_4\}$ complexes

Maryam Taghizadeh Shool<sup>a</sup>, Hadi Amiri Rudbari<sup>a,\*</sup>, Tania Gil-Antón<sup>b</sup>, José V. Cuevas-Vicario<sup>b</sup>, Begoña García<sup>b</sup>, Natalia Busto<sup>b,c,\*</sup>, Nakisa Moimi<sup>d</sup>, Olivier Blacque<sup>e</sup>

<sup>a</sup> Department of Chemistry, University of Isfahan, Isfahan 81746-73441, Iran. Email: [h.a.rudbari@sci.ui.ac.ir](mailto:h.a.rudbari@sci.ui.ac.ir); [hamiri1358@gmail.com](mailto:hamiri1358@gmail.com)

<sup>b</sup> Departamento de Química, Facultad de Ciencias, Universidad de Burgos, Plaza Misael Bañuelos s/n, 09001, Burgos, Spain. [nbusto@ubu.es](mailto:nbusto@ubu.es)

<sup>c</sup> Departamento de Ciencias de la Salud. Facultad de Ciencias de la Salud. Universidad de Burgos, Hospital Militar, Paseo de los Comendadores, s/n, 09001 Burgos, Spain.

<sup>d</sup> Department of Chemistry, Faculty of Physics and Chemistry Alzahra University, P.O. Box 1993891176, Vanak Tehran, Iran.

<sup>e</sup> Department of Chemistry, University of Zurich, Winterthurerstrasse 190, CH-8057, Zurich, Switzerland.

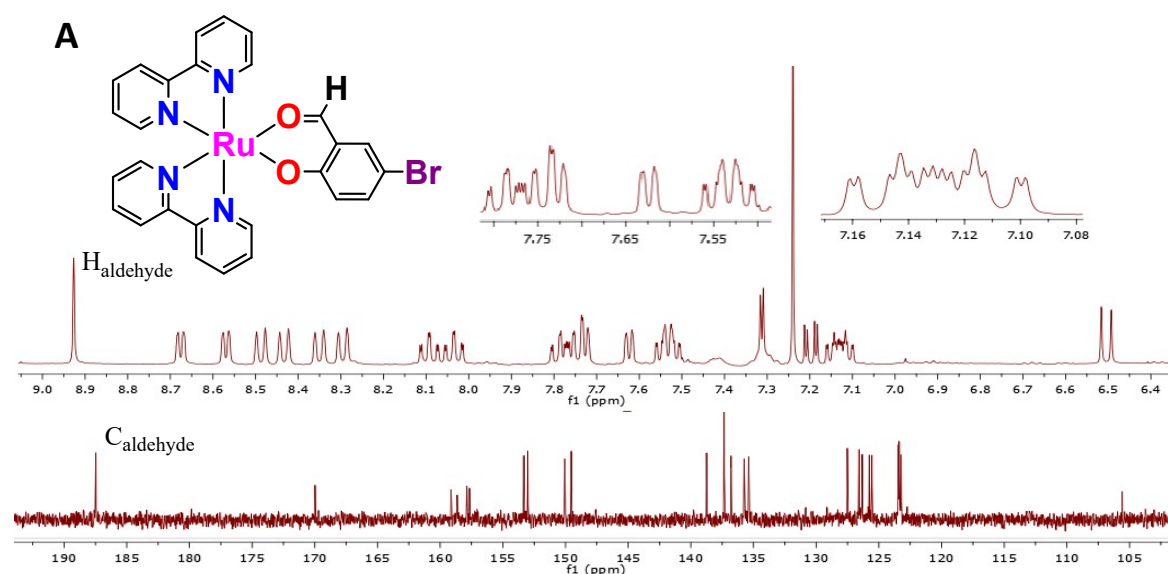

**B**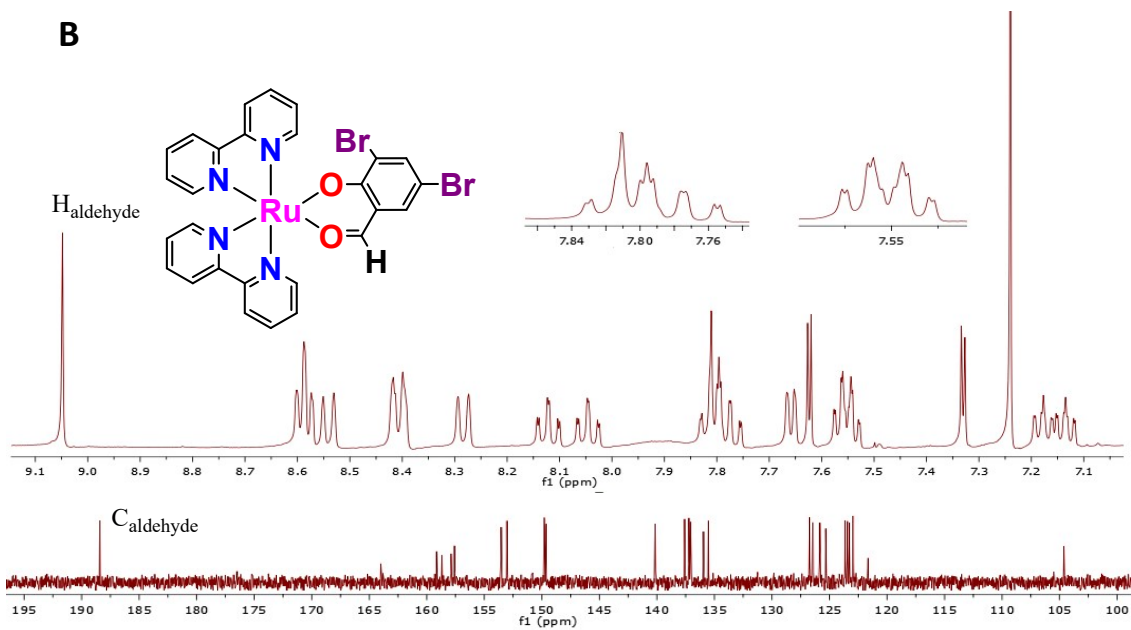**C**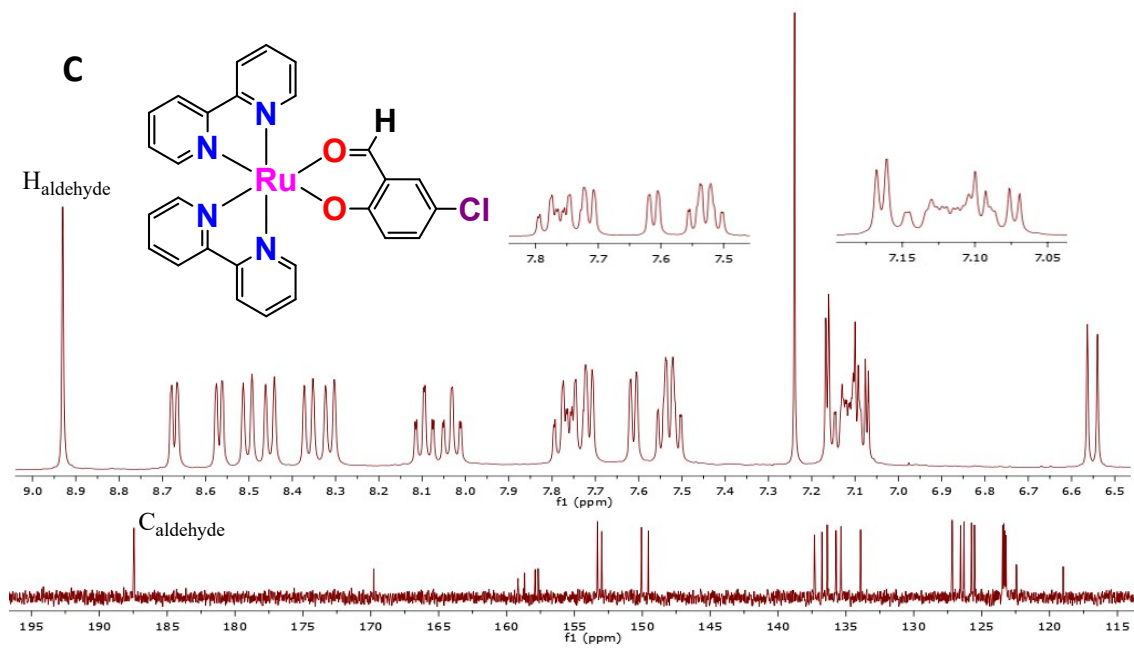

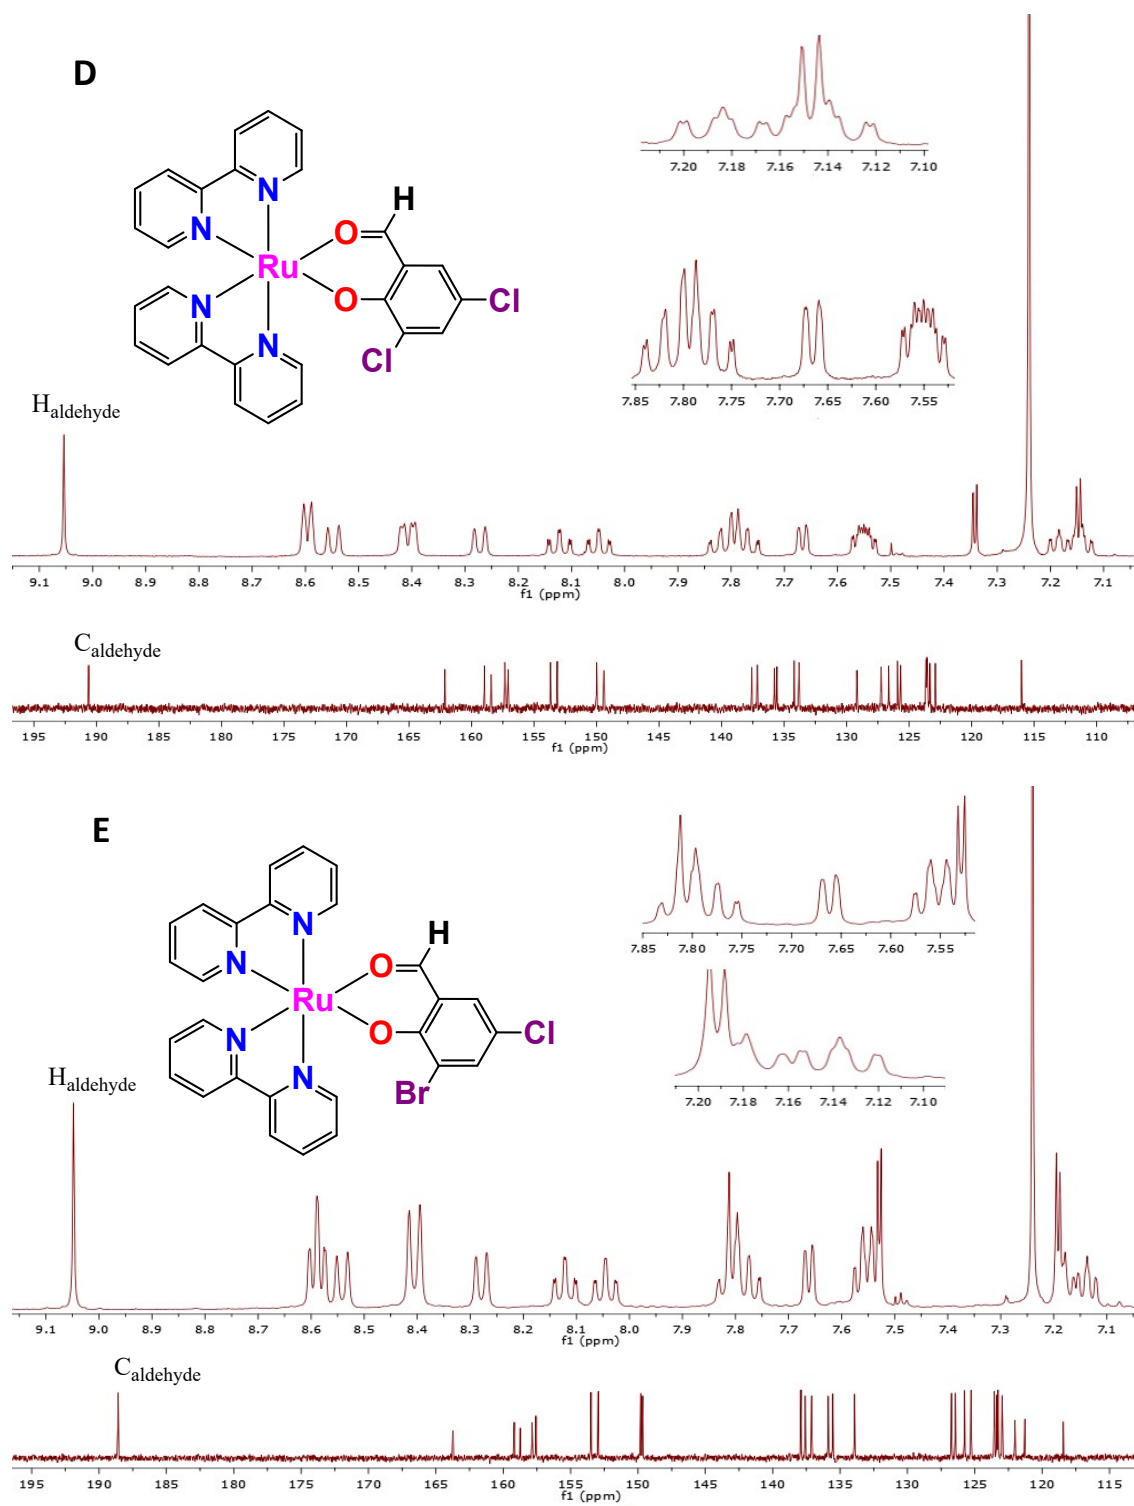

**Figure S1.** A)  $^1\text{H}/^{13}\text{C}$ -NMR spectra of complex 1 in  $\text{CDCl}_3$ , B)  $^1\text{H}/^{13}\text{C}$ -NMR spectra of complex 2 in  $\text{CDCl}_3$ , C)  $^1\text{H}/^{13}\text{C}$ -NMR spectra of complex 3 in  $\text{CDCl}_3$ , D)  $^1\text{H}/^{13}\text{C}$ -NMR spectra of complex 4 in  $\text{CDCl}_3$  and DMSO respectively, E)  $^1\text{H}/^{13}\text{C}$ -NMR spectra of complex 5 in  $\text{CDCl}_3$

**Table S1.** Calculated composition of the molecular orbitals with the participation of the metal center and the ligands.

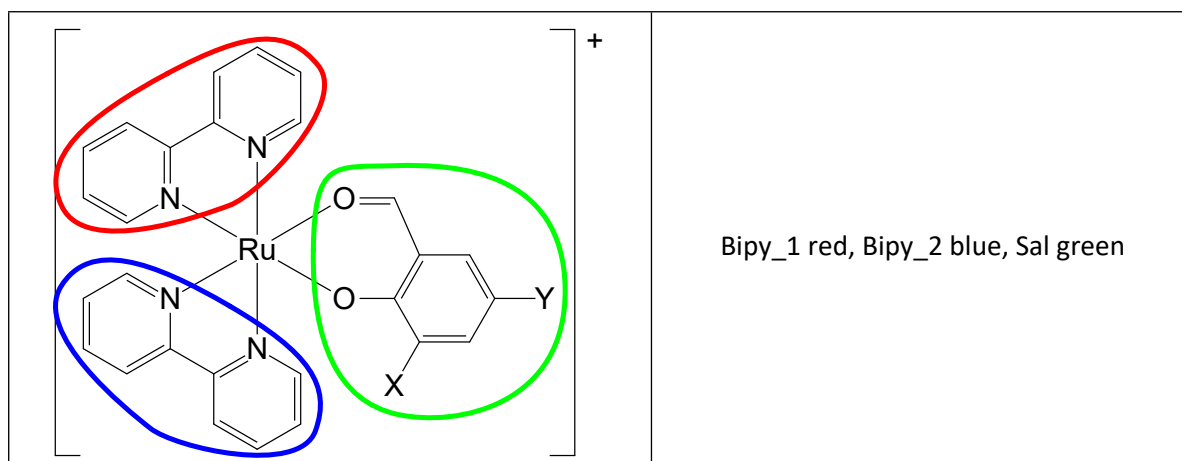

|               | H-5   | H-4   | H-3   | H-2   | H-1   | H     | L     | L+1   | L+2   | L+3   | L+4   | L+5   |
|---------------|-------|-------|-------|-------|-------|-------|-------|-------|-------|-------|-------|-------|
| <b>1</b>      |       |       |       |       |       |       |       |       |       |       |       |       |
| <b>Ru</b>     | 0,86  | 0,39  | 35,62 | 78,88 | 74,63 | 50,73 | 4,51  | 6,37  | 4,37  | 3,12  | 4,73  | 1,16  |
| <b>Bipy_1</b> | 51,73 | 47,04 | 3,48  | 8,51  | 6,67  | 5,33  | 60,30 | 28,74 | 8,19  | 49,14 | 47,01 | 57,67 |
| <b>Bipy_2</b> | 46,86 | 51,87 | 5,42  | 5,79  | 8,08  | 4,64  | 33,25 | 58,53 | 6,42  | 46,89 | 47,55 | 40,79 |
| <b>Sal</b>    | 0,55  | 0,69  | 55,48 | 6,82  | 10,62 | 39,29 | 1,94  | 6,36  | 81,02 | 0,85  | 0,71  | 0,39  |
|               |       |       |       |       |       |       |       |       |       |       |       |       |
| <b>2</b>      | H-5   | H-4   | H-3   | H-2   | H-1   | H     | L     | L+1   | L+2   | L+3   | L+4   | L+5   |
| <b>Ru</b>     | 0,73  | 0,28  | 35,46 | 78,36 | 74,12 | 48,27 | 4,42  | 5,84  | 5,12  | 3,07  | 4,63  | 1,55  |
| <b>Bipy_1</b> | 54,72 | 32,66 | 3,38  | 8,64  | 6,92  | 5,08  | 74,93 | 6,42  | 15,17 | 51,00 | 45,59 | 71,15 |
| <b>Bipy_2</b> | 39,39 | 56,84 | 5,46  | 5,51  | 7,78  | 4,67  | 11,36 | 78,03 | 7,94  | 44,92 | 49,08 | 26,72 |
| <b>Sal</b>    | 5,16  | 10,22 | 55,70 | 7,49  | 11,18 | 41,98 | 9,28  | 9,71  | 71,77 | 1,01  | 0,70  | 0,58  |
|               |       |       |       |       |       |       |       |       |       |       |       |       |
| <b>3</b>      | H-5   | H-4   | H-3   | H-2   | H-1   | H     | L     | L+1   | L+2   | L+3   | L+4   | L+5   |
| <b>Ru</b>     | 0,87  | 0,43  | 36,66 | 78,87 | 74,71 | 50,94 | 4,52  | 6,39  | 4,35  | 3,12  | 4,74  | 1,16  |
| <b>Bipy_1</b> | 51,45 | 47,33 | 3,66  | 8,49  | 6,66  | 5,37  | 60,13 | 29,10 | 8,03  | 49,19 | 47,00 | 58,07 |
| <b>Bipy_2</b> | 47,16 | 51,59 | 5,70  | 5,79  | 8,09  | 4,67  | 33,49 | 58,34 | 6,38  | 46,84 | 47,53 | 40,39 |
| <b>Sal</b>    | 0,53  | 0,65  | 53,98 | 6,85  | 10,54 | 39,02 | 1,86  | 6,17  | 81,24 | 0,85  | 0,73  | 0,38  |
|               |       |       |       |       |       |       |       |       |       |       |       |       |
| <b>4</b>      | H-5   | H-4   | H-3   | H-2   | H-1   | H     | L     | L+1   | L+2   | L+3   | L+4   | L+5   |
| <b>Ru</b>     | 0,83  | 0,39  | 36,49 | 78,49 | 74,34 | 48,52 | 4,55  | 5,96  | 4,96  | 0,87  | 4,59  | 1,47  |
| <b>Bipy_1</b> | 61,24 | 36,60 | 3,68  | 8,62  | 6,87  | 5,30  | 75,03 | 8,08  | 13,58 | 51,45 | 46,51 | 66,75 |
| <b>Bipy_2</b> | 37,14 | 61,14 | 5,72  | 5,54  | 7,90  | 4,65  | 12,82 | 77,13 | 7,43  | 47,16 | 48,17 | 31,24 |
| <b>Sal</b>    | 0,79  | 1,86  | 54,10 | 7,35  | 10,90 | 41,53 | 7,60  | 8,84  | 74,02 | 0,53  | 0,73  | 0,53  |
|               |       |       |       |       |       |       |       |       |       |       |       |       |
| <b>5</b>      | H-5   | H-4   | H-3   | H-2   | H-1   | H     | L     | L+1   | L+2   | L+3   | L+4   | L+5   |
| <b>Ru</b>     | 2,78  | 0,91  | 1,61  | 78,65 | 74,18 | 48,22 | 4,49  | 5,93  | 5,02  | 3,06  | 4,64  | 1,55  |
| <b>Bipy_1</b> | 6,75  | 59,14 | 32,03 | 8,53  | 6,96  | 5,10  | 75,27 | 7,04  | 14,25 | 51,03 | 45,55 | 70,92 |
| <b>Bipy_2</b> | 2,33  | 37,48 | 57,58 | 5,43  | 7,75  | 4,73  | 11,75 | 78,02 | 7,61  | 44,90 | 49,09 | 26,97 |
| <b>Sal</b>    | 88,14 | 2,47  | 8,78  | 7,39  | 11,11 | 41,95 | 8,49  | 9,01  | 73,11 | 1,01  | 0,72  | 0,56  |
|               |       |       |       |       |       |       |       |       |       |       |       |       |

**Table S2.** Lowest Singlet and Triplet Excited States Calculated at the TDDFT B3LYP/(def2-SVP+LANL2DZ) Level for Complexes **2-5** in Water Solution<sup>a</sup>

| Complex  | Estate          | Energy (eV)  | $\lambda$ (nm) | f.osc.        | Monoexcitaciones                                                                                 | Nature                                                                                                                                                                                                  | Description                                                                                       |
|----------|-----------------|--------------|----------------|---------------|--------------------------------------------------------------------------------------------------|---------------------------------------------------------------------------------------------------------------------------------------------------------------------------------------------------------|---------------------------------------------------------------------------------------------------|
| <b>2</b> | S <sub>1</sub>  | 2.247        | 551.7          | 0.0008        | HOMO-1 $\rightarrow$ LUMO+2 (94)                                                                 | $d_{\pi}(\text{Ru}) \rightarrow \pi_{\text{sal}}^*$                                                                                                                                                     | <sup>1</sup> MLCT                                                                                 |
|          | S <sub>2</sub>  | 2.264        | 547.5          | 0.0019        | HOMO-1 $\rightarrow$ LUMO (78)                                                                   | $d_{\pi}(\text{Ru}) \rightarrow \pi_{\text{bpy}}^*$                                                                                                                                                     | <sup>1</sup> MLCT                                                                                 |
|          | S <sub>3</sub>  | 2.282        | 543.3          | 0.0017        | HOMO $\rightarrow$ LUMO (22)<br>HOMO $\rightarrow$ LUMO+1 (47)                                   | $d_{\pi}(\text{Ru}) + \pi_{\text{sal}} \rightarrow \pi_{\text{bpy}}^*$<br>$d_{\pi}(\text{Ru}) + \pi_{\text{sal}} \rightarrow \pi_{\text{bpy}}^*$                                                        | <sup>1</sup> MLCT/ <sup>1</sup> LLCT<br><sup>1</sup> MLCT/ <sup>1</sup> LLCT                      |
|          | S <sub>8</sub>  | <b>2.816</b> | <b>445.5</b>   | <b>0.1209</b> | HOMO-2 $\rightarrow$ LUMO (70)<br>HOMO-2 $\rightarrow$ LUMO+1 (17)                               | $d_{\pi}(\text{Ru}) \rightarrow \pi_{\text{bpy}}^*$<br>$d_{\pi}(\text{Ru}) \rightarrow \pi_{\text{bpy}}^*$                                                                                              | <sup>1</sup> MLCT<br><sup>1</sup> MLCT                                                            |
|          | S <sub>21</sub> | <b>3.618</b> | <b>342.7</b>   | <b>0.1067</b> | HOMO-2 $\rightarrow$ LUMO+3 (55)<br>HOMO-1 $\rightarrow$ LUMO+5 (28)                             | $d_{\pi}(\text{Ru}) \rightarrow \pi_{\text{bpy}}^*$<br>$d_{\pi}(\text{Ru}) \rightarrow \pi_{\text{bpy}}^*$                                                                                              | <sup>1</sup> MLCT<br><sup>1</sup> MLCT                                                            |
|          | T <sub>1</sub>  | 1.750        | 708.7          |               | HOMO-1 $\rightarrow$ LUMO+2 (89)                                                                 | $d_{\pi}(\text{Ru}) \rightarrow \pi_{\text{sal}}^*$                                                                                                                                                     | <sup>3</sup> MLCT                                                                                 |
|          | T <sub>2</sub>  | 1.853        | 669.2          |               | HOMO-1 $\rightarrow$ LUMO (34)<br>HOMO $\rightarrow$ LUMO (41)                                   | $d_{\pi}(\text{Ru}) \rightarrow \pi_{\text{bpy}}^*$<br>$d_{\pi}(\text{Ru}) + \pi_{\text{sal}} \rightarrow \pi_{\text{bpy}}^*$                                                                           | <sup>3</sup> MLCT<br><sup>3</sup> MLCT/ <sup>3</sup> LLCT                                         |
|          | T <sub>3</sub>  | 1.896        | 653.9          |               | HOMO-1 $\rightarrow$ LUMO (34)<br>HOMO $\rightarrow$ LUMO (23)<br>HOMO $\rightarrow$ LUMO+1 (31) | $d_{\pi}(\text{Ru}) \rightarrow \pi_{\text{bpy}}^*$<br>$d_{\pi}(\text{Ru}) + \pi_{\text{sal}} \rightarrow \pi_{\text{bpy}}^*$<br>$d_{\pi}(\text{Ru}) + \pi_{\text{sal}} \rightarrow \pi_{\text{bpy}}^*$ | <sup>3</sup> MLCT<br><sup>3</sup> MLCT/ <sup>3</sup> LLCT<br><sup>3</sup> MLCT/ <sup>3</sup> LLCT |
|          | T <sub>4</sub>  | 1.902        | 652.0          |               | HOMO $\rightarrow$ LUMO (17)<br>HOMO $\rightarrow$ LUMO+2 (69)                                   | $d_{\pi}(\text{Ru}) + \pi_{\text{sal}} \rightarrow \pi_{\text{bpy}}^*$<br>$d_{\pi}(\text{Ru}) + \pi_{\text{sal}} \rightarrow \pi_{\text{sal}}^*$                                                        | <sup>3</sup> MLCT/ <sup>3</sup> LLCT<br><sup>3</sup> MLCT/ <sup>3</sup> LC                        |
|          | T <sub>5</sub>  | 1.991        | 622.7          |               | HOMO-1 $\rightarrow$ LUMO (25)<br>HOMO-1 $\rightarrow$ LUMO+1 (47)                               | $d_{\pi}(\text{Ru}) \rightarrow \pi_{\text{bpy}}^*$<br>$d_{\pi}(\text{Ru}) \rightarrow \pi_{\text{bpy}}^*$                                                                                              | <sup>3</sup> MLCT<br><sup>3</sup> MLCT                                                            |
| <b>3</b> | S <sub>1</sub>  | 2.082        | 595.4          | 0.0069        | HOMO $\rightarrow$ LUMO (76)                                                                     | $d_{\pi}(\text{Ru}) + \pi_{\text{sal}} \rightarrow \pi_{\text{bpy}}^*$                                                                                                                                  | <sup>1</sup> MLCT/ <sup>1</sup> LLCT                                                              |
|          | S <sub>2</sub>  | 2.113        | 586.7          | 0.0024        | HOMO $\rightarrow$ LUMO+1 (66)                                                                   | $d_{\pi}(\text{Ru}) + \pi_{\text{sal}} \rightarrow \pi_{\text{bpy}}^*$                                                                                                                                  | <sup>1</sup> MLCT/ <sup>1</sup> LLCT                                                              |
|          | S <sub>3</sub>  | 2.205        | 562.4          | 0.0140        | HOMO-1 $\rightarrow$ LUMO (72)<br>HOMO-1 $\rightarrow$ LUMO+1 (19)                               | $d_{\pi}(\text{Ru}) + \rightarrow \pi_{\text{bpy}}^*$<br>$d_{\pi}(\text{Ru}) + \rightarrow \pi_{\text{bpy}}^*$                                                                                          | <sup>1</sup> MLCT<br><sup>1</sup> MLCT                                                            |
|          | S <sub>8</sub>  | <b>2.792</b> | <b>444.1</b>   | <b>0.0997</b> | HOMO-2 $\rightarrow$ LUMO (34)<br>HOMO-2 $\rightarrow$ LUMO+1 (49)                               | $d_{\pi}(\text{Ru}) \rightarrow \pi_{\text{bpy}}^*$<br>$d_{\pi}(\text{Ru}) \rightarrow \pi_{\text{bpy}}^*$                                                                                              | <sup>1</sup> MLCT<br><sup>1</sup> MLCT                                                            |
|          | S <sub>20</sub> | <b>3.578</b> | <b>346.6</b>   | <b>0.0906</b> | HOMO-2 $\rightarrow$ LUMO+3 (45)<br>HOMO-1 $\rightarrow$ LUMO+5 (45)                             | $d_{\pi}(\text{Ru}) \rightarrow \pi_{\text{bpy}}^*$<br>$d_{\pi}(\text{Ru}) \rightarrow \pi_{\text{bpy}}^*$                                                                                              | <sup>1</sup> MLCT<br><sup>1</sup> MLCT                                                            |
|          | T <sub>1</sub>  | 1.715        | 723.0          |               | HOMO $\rightarrow$ LUMO (20)<br>HOMO $\rightarrow$ LUMO+1 (66)                                   | $d_{\pi}(\text{Ru}) + \pi_{\text{sal}} \rightarrow \pi_{\text{bpy}}^*$<br>$d_{\pi}(\text{Ru}) + \pi_{\text{sal}} \rightarrow \pi_{\text{bpy}}^*$                                                        | <sup>3</sup> MLCT/ <sup>3</sup> LLCT<br><sup>3</sup> MLCT/ <sup>3</sup> LLCT                      |
|          | T <sub>2</sub>  | 1.769        | 700.9          |               | HOMO-1 $\rightarrow$ LUMO (91)<br>HOMO $\rightarrow$ LUMO (20)                                   | $d_{\pi}(\text{Ru}) + \rightarrow \pi_{\text{bpy}}^*$<br>$d_{\pi}(\text{Ru}) + \pi_{\text{sal}} \rightarrow \pi_{\text{bpy}}^*$                                                                         | <sup>3</sup> MLCT<br><sup>3</sup> MLCT/ <sup>3</sup> LLCT                                         |
|          | T <sub>3</sub>  | 1.774        | 699.0          |               | HOMO-1 $\rightarrow$ LUMO+2 (93)                                                                 | $d_{\pi}(\text{Ru}) + \rightarrow \pi_{\text{sal}}^*$                                                                                                                                                   | <sup>3</sup> MLCT                                                                                 |
|          | T <sub>4</sub>  | 1.934        | 641.2          |               | HOMO $\rightarrow$ LUMO+1 (76)                                                                   | $d_{\pi}(\text{Ru}) + \pi_{\text{sal}} \rightarrow \pi_{\text{bpy}}^*$                                                                                                                                  | <sup>3</sup> MLCT/ <sup>3</sup> LLCT                                                              |
|          | T <sub>5</sub>  | 1.945        | 637.4          |               | HOMO-1 $\rightarrow$ LUMO+1 (57)<br>HOMO $\rightarrow$ LUMO (26)                                 | $d_{\pi}(\text{Ru}) \rightarrow \pi_{\text{bpy}}^*$<br>$d_{\pi}(\text{Ru}) + \pi_{\text{sal}} \rightarrow \pi_{\text{bpy}}^*$                                                                           | <sup>3</sup> MLCT<br><sup>3</sup> MLCT/ <sup>3</sup> LLCT                                         |
| <b>4</b> | S <sub>1</sub>  | 2.246        | 552.0          | 0.0084        | HOMO-1 $\rightarrow$ LUMO+2 (93)                                                                 | $d_{\pi}(\text{Ru}) \rightarrow \pi_{\text{sal}}^*$                                                                                                                                                     | <sup>1</sup> MLCT                                                                                 |
|          | S <sub>2</sub>  | 2.249        | 551.2          | 0.0194        | HOMO-1 $\rightarrow$ LUMO (81)                                                                   | $d_{\pi}(\text{Ru}) \rightarrow \pi_{\text{bpy}}^*$                                                                                                                                                     | <sup>1</sup> MLCT                                                                                 |
|          | S <sub>3</sub>  | 2.266        | 547.3          | 0.0038        | HOMO $\rightarrow$ LUMO+1 (58)                                                                   | $d_{\pi}(\text{Ru}) + \pi_{\text{sal}} \rightarrow \pi_{\text{bpy}}^*$                                                                                                                                  | <sup>1</sup> MLCT / <sup>1</sup> LLCT                                                             |
|          | S <sub>8</sub>  | <b>2.808</b> | <b>441.6</b>   | <b>0.1138</b> | HOMO-2 $\rightarrow$ LUMO (66)<br>HOMO-2 $\rightarrow$ LUMO+1 (20)                               | $d_{\pi}(\text{Ru}) \rightarrow \pi_{\text{bpy}}^*$<br>$d_{\pi}(\text{Ru}) \rightarrow \pi_{\text{bpy}}^*$                                                                                              | <sup>1</sup> MLCT<br><sup>1</sup> MLCT                                                            |
|          | S <sub>21</sub> | <b>3.671</b> | <b>337.8</b>   | <b>0.1436</b> | HOMO-3 $\rightarrow$ LUMO+2 (31)<br>HOMO-2 $\rightarrow$ LUMO+3 (33)                             | $d_{\pi}(\text{Ru}) + \pi_{\text{sal}} \rightarrow \pi_{\text{bpy}}^*$<br>$d_{\pi}(\text{Ru}) \rightarrow \pi_{\text{bpy}}^*$                                                                           | <sup>1</sup> MLCT/ <sup>1</sup> LLCT<br><sup>1</sup> MLCT                                         |

|   |                 |              |              |               |                                                                |                                                                                                                                                                                                         |                                                                                   |
|---|-----------------|--------------|--------------|---------------|----------------------------------------------------------------|---------------------------------------------------------------------------------------------------------------------------------------------------------------------------------------------------------|-----------------------------------------------------------------------------------|
|   |                 |              |              |               | HOMO-1 → LUMO+5 (26)                                           | $d_{\pi}(\text{Ru}) \rightarrow \pi^*_{\text{bpy}}$                                                                                                                                                     | $^1\text{MLCT}$                                                                   |
|   |                 |              |              |               |                                                                |                                                                                                                                                                                                         |                                                                                   |
|   | T <sub>1</sub>  | 1.731        | 716.3        |               | HOMO-1 → LUMO+2 (91)                                           | $d_{\pi}(\text{Ru}) \rightarrow \pi^*_{\text{sal}}$                                                                                                                                                     | $^3\text{MLCT}$                                                                   |
|   | T <sub>2</sub>  | 1.836        | 675.2        |               | HOMO-1 → LUMO (40)<br>HOMO → LUMO (36)                         | $d_{\pi}(\text{Ru}) \rightarrow \pi^*_{\text{bpy}}$<br>$d_{\pi}(\text{Ru}) + \pi_{\text{sal}} \rightarrow \pi^*_{\text{bpy}}$                                                                           | $^3\text{MLCT}/^3\text{LLCT}$                                                     |
|   | T <sub>3</sub>  | 1.888        | 656.6        |               | HOMO → LUMO (15)<br>HOMO → LUMO+2 (75)                         | $d_{\pi}(\text{Ru}) + \pi_{\text{sal}} \rightarrow \pi^*_{\text{bpy}}$<br>$d_{\pi}(\text{Ru}) + \pi_{\text{sal}} \rightarrow \pi^*_{\text{sal}}$                                                        | $^3\text{MLCT}/^3\text{LLCT}$<br>$^3\text{MLCT}/^3\text{LC}$                      |
|   | T <sub>4</sub>  | 1.925        | 644.2        |               | HOMO-1 → LUMO+1 (39)<br>HOMO → LUMO (27)<br>HOMO → LUMO+1 (20) | $d_{\pi}(\text{Ru}) \rightarrow \pi^*_{\text{bpy}}$<br>$d_{\pi}(\text{Ru}) + \pi_{\text{sal}} \rightarrow \pi^*_{\text{bpy}}$<br>$d_{\pi}(\text{Ru}) + \pi_{\text{sal}} \rightarrow \pi^*_{\text{bpy}}$ | $^3\text{MLCT}$<br>$^3\text{MLCT}/^3\text{LLCT}$<br>$^3\text{MLCT}/^3\text{LLCT}$ |
|   | T <sub>5</sub>  | 1.958        | 633.2        |               | HOMO-1 → LUMO (22)<br>HOMO → LUMO+1 (58)                       | $d_{\pi}(\text{Ru}) \rightarrow \pi^*_{\text{bpy}}$<br>$d_{\pi}(\text{Ru}) + \pi_{\text{sal}} \rightarrow \pi^*_{\text{bpy}}$                                                                           | $^3\text{MLCT}$<br>$^3\text{MLCT}/^3\text{LLCT}$                                  |
|   |                 |              |              |               |                                                                |                                                                                                                                                                                                         |                                                                                   |
| 5 | S <sub>1</sub>  | 2.245        | 552.3        | 0.0079        | HOMO-1 → LUMO+2 (95)                                           | $d_{\pi}(\text{Ru}) \rightarrow \pi^*_{\text{sal}}$                                                                                                                                                     | $^1\text{MLCT}$                                                                   |
|   | S <sub>2</sub>  | 2.259        | 548.9        | 0.0200        | HOMO-1 → LUMO (79)                                             | $d_{\pi}(\text{Ru}) \rightarrow \pi^*_{\text{bpy}}$                                                                                                                                                     | $^1\text{MLCT}$                                                                   |
|   | S <sub>3</sub>  | 2.265        | 547.4        | 0.0036        | HOMO → LUMO (16)<br>HOMO → LUMO+1 (58)                         | $d_{\pi}(\text{Ru}) + \pi_{\text{sal}} \rightarrow \pi^*_{\text{bpy}}$<br>$d_{\pi}(\text{Ru}) + \pi_{\text{sal}} \rightarrow \pi^*_{\text{bpy}}$                                                        | $^1\text{MLCT}/^1\text{LLCT}$<br>$^1\text{MLCT}/^1\text{LLCT}$                    |
|   | S <sub>8</sub>  | <b>2.814</b> | <b>440.6</b> | <b>0.1168</b> | HOMO-2 → LUMO (69)<br>HOMO-2 → LUMO+1 (18)                     | $d_{\pi}(\text{Ru}) \rightarrow \pi^*_{\text{bpy}}$<br>$d_{\pi}(\text{Ru}) \rightarrow \pi^*_{\text{bpy}}$                                                                                              | $^1\text{MLCT}$<br>$^1\text{MLCT}$                                                |
|   | S <sub>21</sub> | <b>3.624</b> | <b>342.1</b> | <b>0.1179</b> | HOMO-2 → LUMO+3 (53)<br>HOMO-1 → LUMO+5 (29)                   | $d_{\pi}(\text{Ru}) \rightarrow \pi^*_{\text{bpy}}$<br>$d_{\pi}(\text{Ru}) \rightarrow \pi^*_{\text{bpy}}$                                                                                              | $^1\text{MLCT}$<br>$^1\text{MLCT}$                                                |
|   |                 |              |              |               |                                                                |                                                                                                                                                                                                         |                                                                                   |
|   | T <sub>1</sub>  | 1.742        | 711.9        |               | HOMO-1 → LUMO+2 (90)                                           | $d_{\pi}(\text{Ru}) \rightarrow \pi^*_{\text{sal}}$                                                                                                                                                     | $^3\text{MLCT}$                                                                   |
|   | T <sub>2</sub>  | 1.858        | 667.2        |               | HOMO-1 → LUMO (35)<br>HOMO → LUMO (40)                         | $d_{\pi}(\text{Ru}) \rightarrow \pi^*_{\text{bpy}}$<br>$d_{\pi}(\text{Ru}) + \pi_{\text{sal}} \rightarrow \pi^*_{\text{bpy}}$                                                                           | $^3\text{MLCT}$<br>$^3\text{MLCT}/^3\text{LLCT}$                                  |
|   | T <sub>3</sub>  | 1.894        | 654.5        |               | HOMO → LUMO (16)<br>HOMO → LUMO+2 (71)                         | $d_{\pi}(\text{Ru}) + \pi_{\text{sal}} \rightarrow \pi^*_{\text{bpy}}$<br>$d_{\pi}(\text{Ru}) + \pi_{\text{sal}} \rightarrow \pi^*_{\text{sal}}$                                                        | $^3\text{MLCT}/^3\text{LLCT}$<br>$^3\text{MLCT}/^3\text{LC}$                      |
|   | T <sub>4</sub>  | 1.914        | 647.7        |               | HOMO-1 → LUMO+1 (38)<br>HOMO → LUMO (25)<br>HOMO → LUMO+1 (24) | $d_{\pi}(\text{Ru}) \rightarrow \pi^*_{\text{bpy}}$<br>$d_{\pi}(\text{Ru}) + \pi_{\text{sal}} \rightarrow \pi^*_{\text{bpy}}$<br>$d_{\pi}(\text{Ru}) + \pi_{\text{sal}} \rightarrow \pi^*_{\text{bpy}}$ | $^3\text{MLCT}$<br>$^3\text{MLCT}/^3\text{LLCT}$<br>$^3\text{MLCT}/^3\text{LLCT}$ |
|   | T <sub>5</sub>  | 1.980        | 626.3        |               | HOMO-1 → LUMO (24)<br>HOMO → LUMO+1 (53)                       | $d_{\pi}(\text{Ru}) \rightarrow \pi^*_{\text{bpy}}$<br>$d_{\pi}(\text{Ru}) + \pi_{\text{sal}} \rightarrow \pi^*_{\text{bpy}}$                                                                           | $^3\text{MLCT}$<br>$^3\text{MLCT}/^3\text{LLCT}$                                  |

<sup>a</sup>Vertical excitation energies (E), dominant monoexcitations with contributions (within parentheses) of >15%, the nature of the electronic transition, and the description of the excited state are summarized.

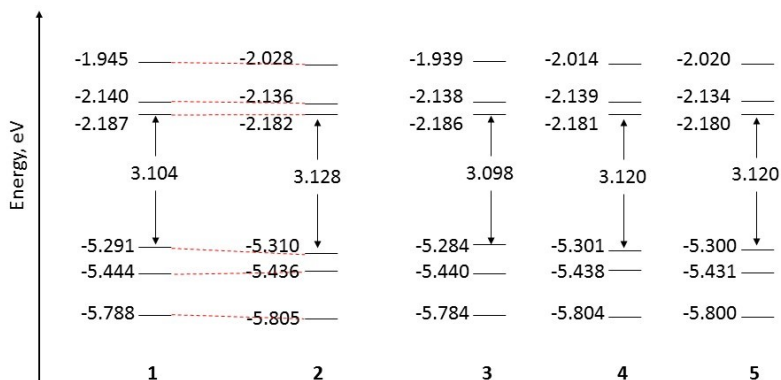

**Figure S2.** Calculated energy levels of the FMOs for complexes **1-5**.

**Compound 2.**

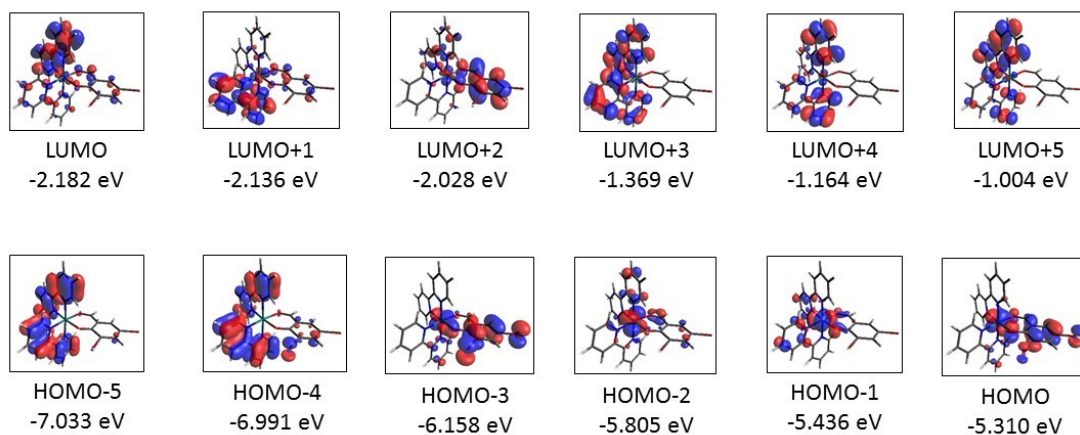

**Figure S3.** FMOs for complex 2.

**Compound 3.**

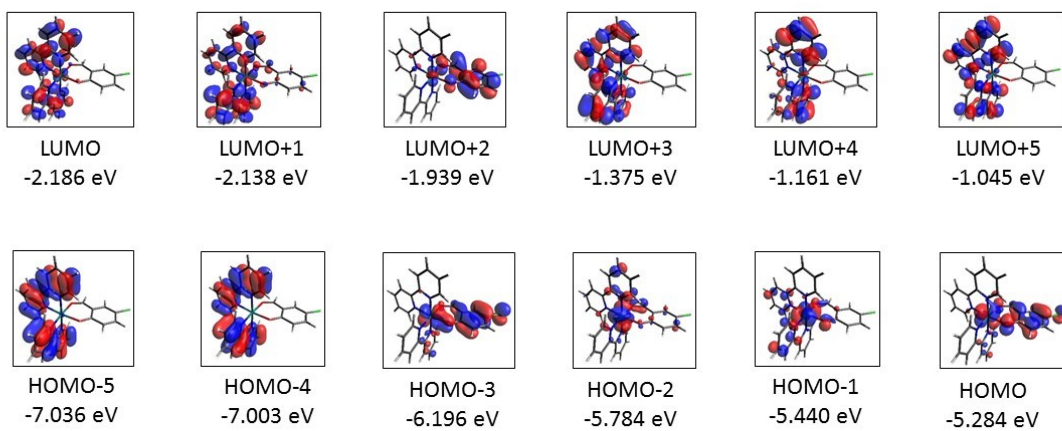

**Figure S4.** FMOs for complex 3.



**Compound 4.**

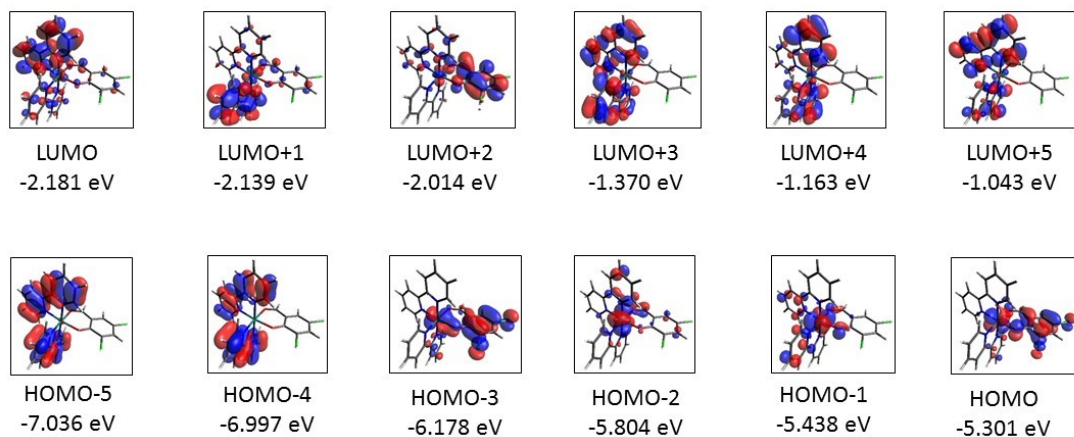

**Figure S5.** FMOs for complex 4.

**Compound 5.**

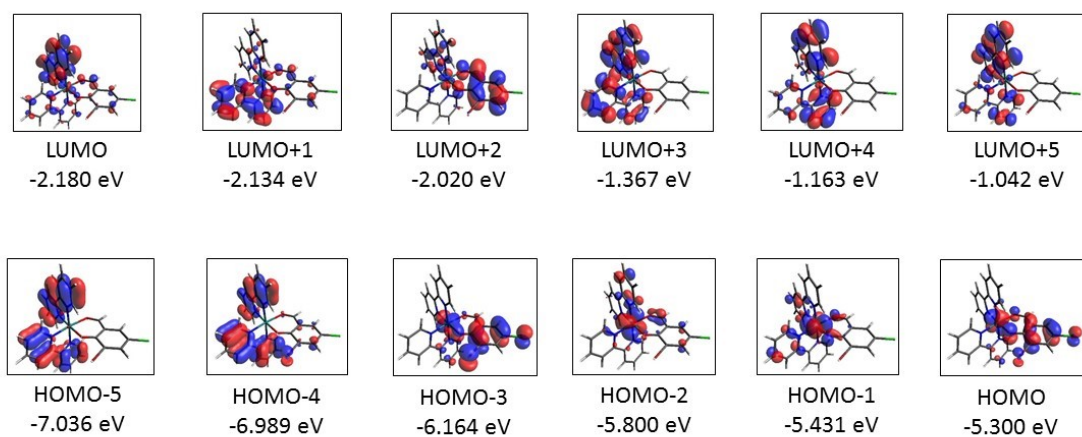

**Figure S6.** FMOs for complex 5.



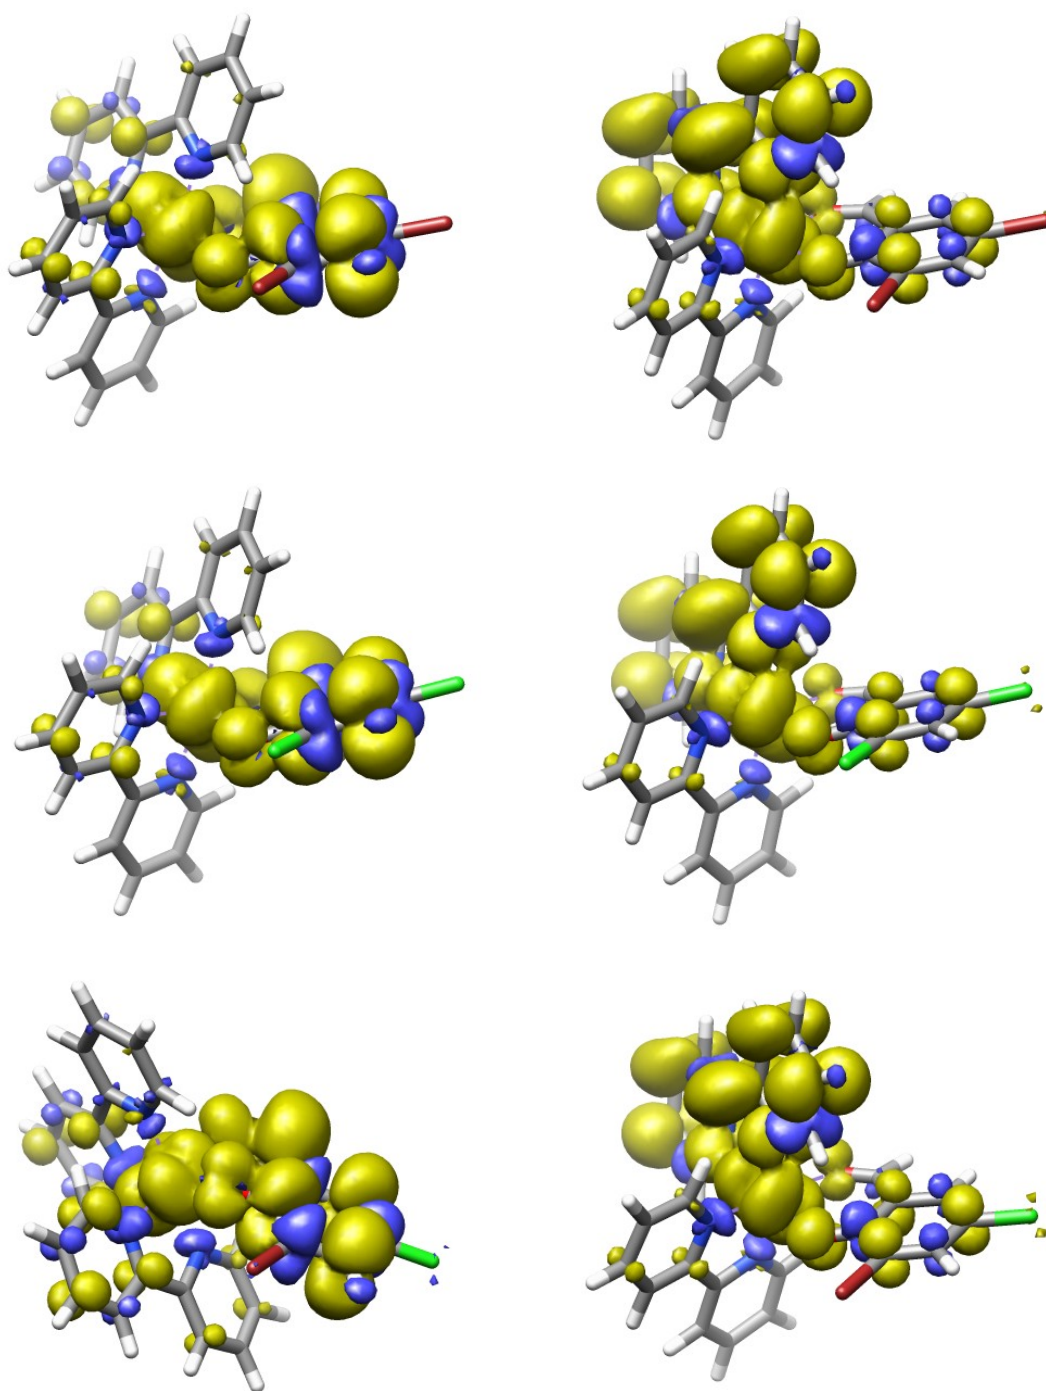

**Figure S7.** Spin-density contours calculated for fully relaxed  $T_1$  (left) and  $T_2$  (right) states of complex **2** (up), **4** (middle) and **5** (down).

**Table S3.** Calculated spin-density values for the optimized triplet states

|                               | 1         | 2         | 3         | 4         | 5         |
|-------------------------------|-----------|-----------|-----------|-----------|-----------|
|                               |           |           |           |           |           |
| <b>Triplets T<sub>1</sub></b> |           |           |           |           |           |
| Ru                            | 0,77266   | 0,788774  | 0,770134  | 0,787451  | 0,837568  |
| bpy1 (red)                    | 0,014564  | 0,016658  | 0,014433  | 0,016112  | 0,010139  |
| bpy2 (blue)                   | 0,009992  | 0,005802  | 0,00972   | 0,007144  | 0,021477  |
| Sal (Green)                   | 1,202782  | 1,188764  | 1,205711  | 1,189293  | 1,130817  |
| <b>Triplets T<sub>2</sub></b> |           |           |           |           |           |
| Ru                            | 0,83879   | 0,843156  | 0,835579  | 0,836799  | 0,839924  |
| bpy1 (red)                    | 1,014541  | 1,017636  | 1,013825  | 1,013483  | 1,016898  |
| bpy2 (blue)                   | -0,004531 | -0,003939 | -0,004794 | -0,003682 | -0,004125 |
| Sal (Green)                   | 0,151199  | 0,143148  | 0,155391  | 0,153403  | 0,147306  |

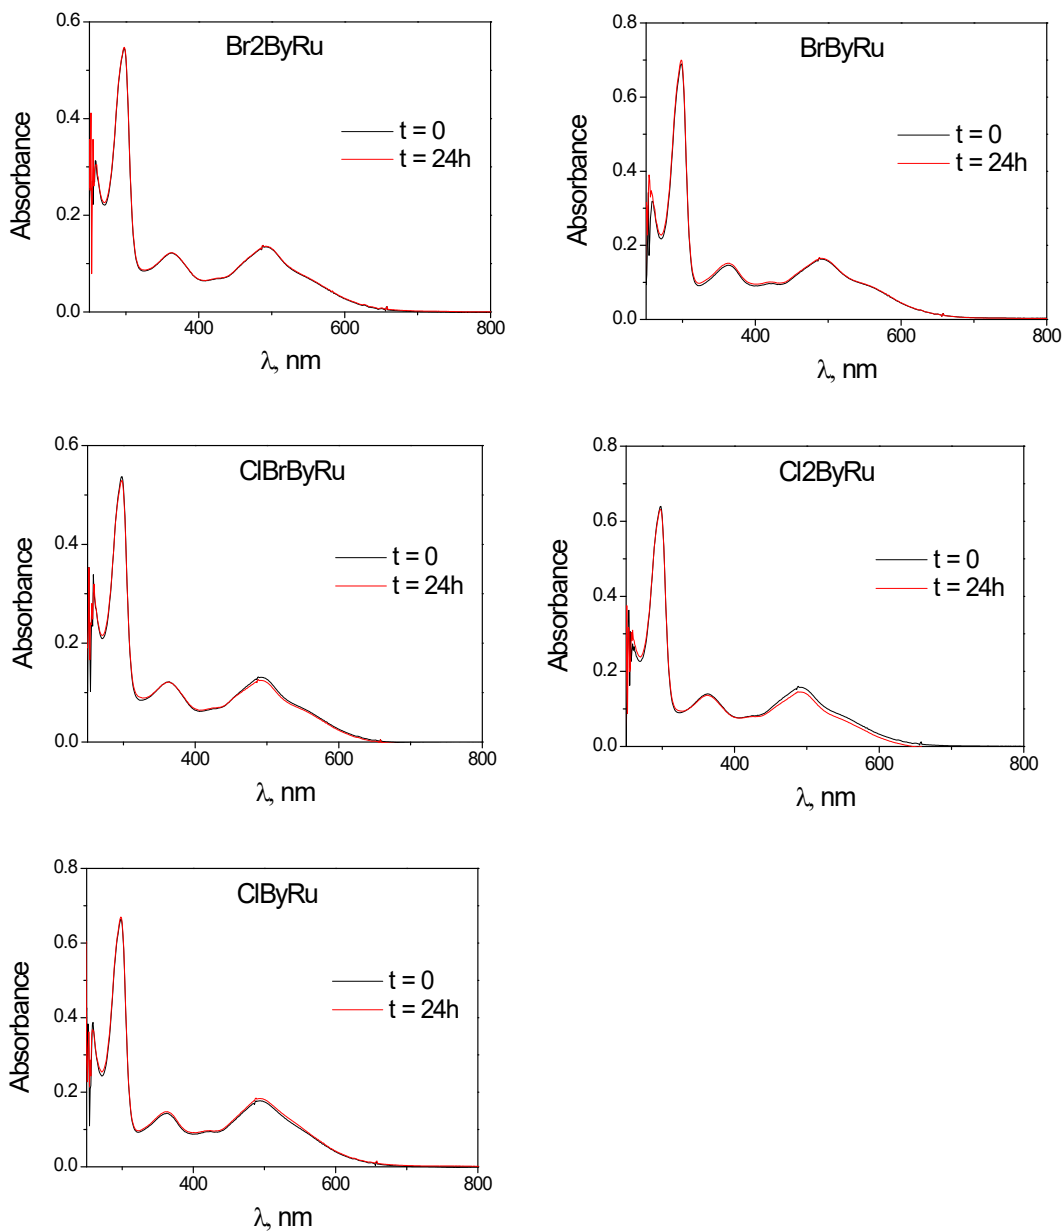

**Figure S8** Absorbance spectra of 20  $\mu$ M of the compounds under study recorded in DMSO just after being dissolved and after 24 h.

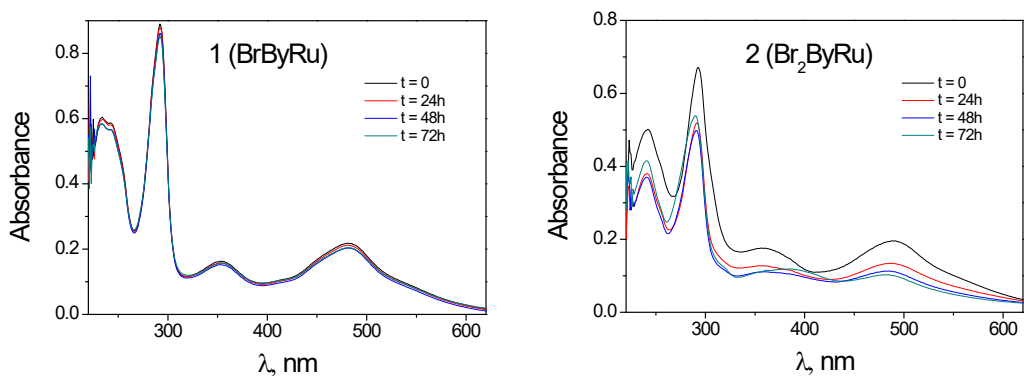

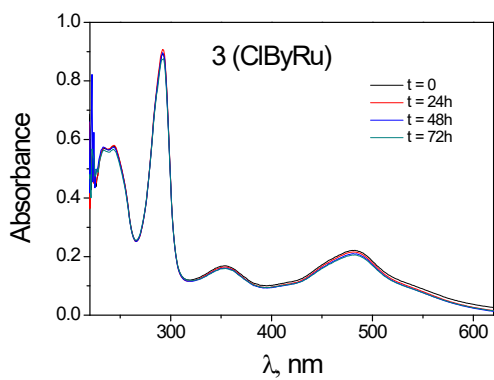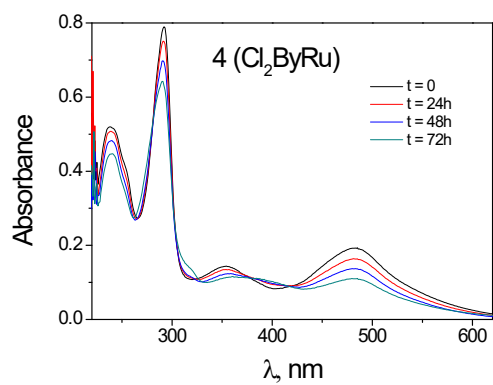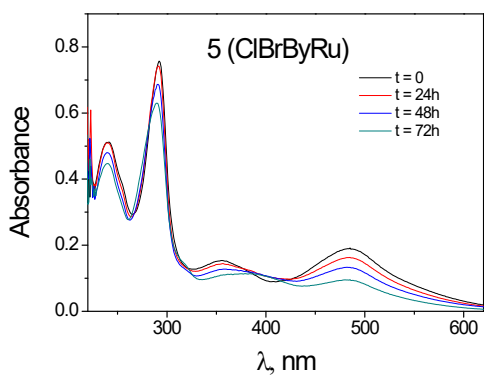

**Figure S9.** Absorbance spectra of the Ru(II) complexes (25  $\mu$ M) as a function of time recorded in buffer (2.5 mM NaCaC), pH = 7, 0.1 %DMSO and T = 25°C.

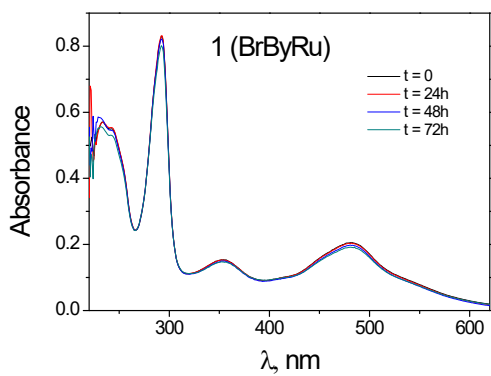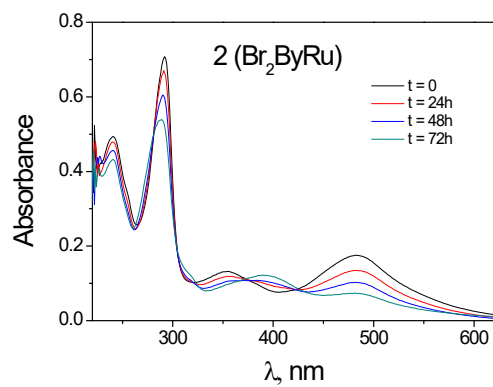

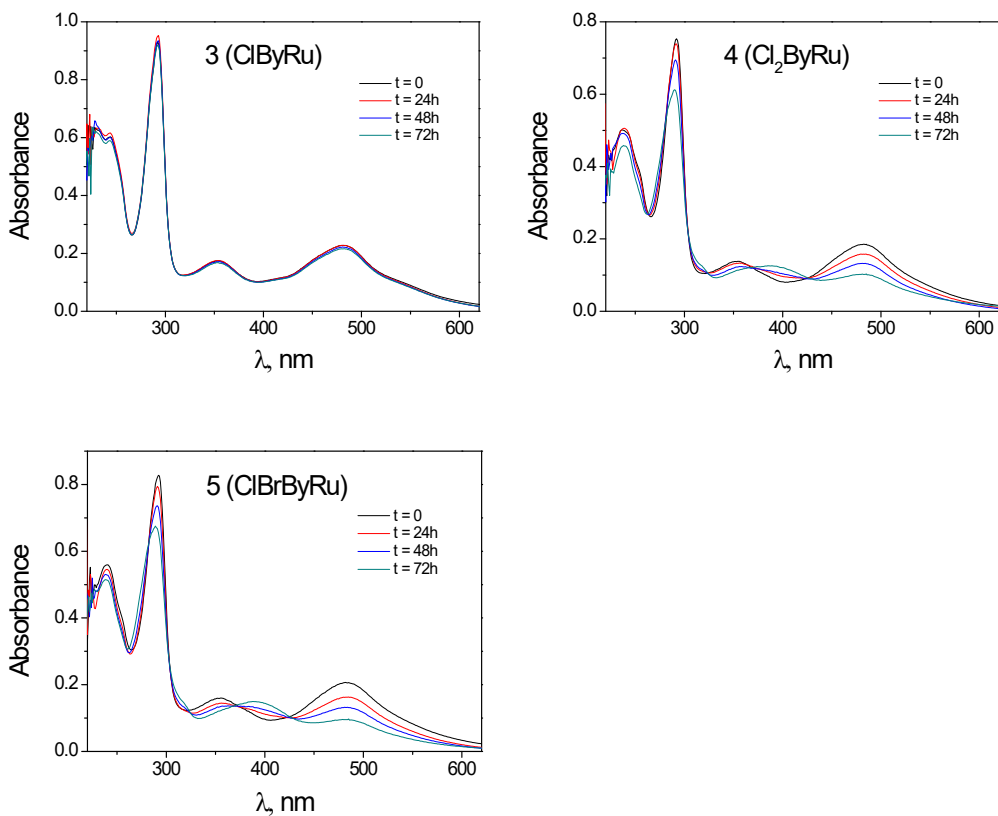

**Figure S10.** Absorbance spectra of the Ru(II) complexes (25  $\mu$ M) as a function of time recorded in buffer (2.5 mM NaCaC, 0.1M NaCl), pH = 7, 0.1 %DMSO and T = 25°C.

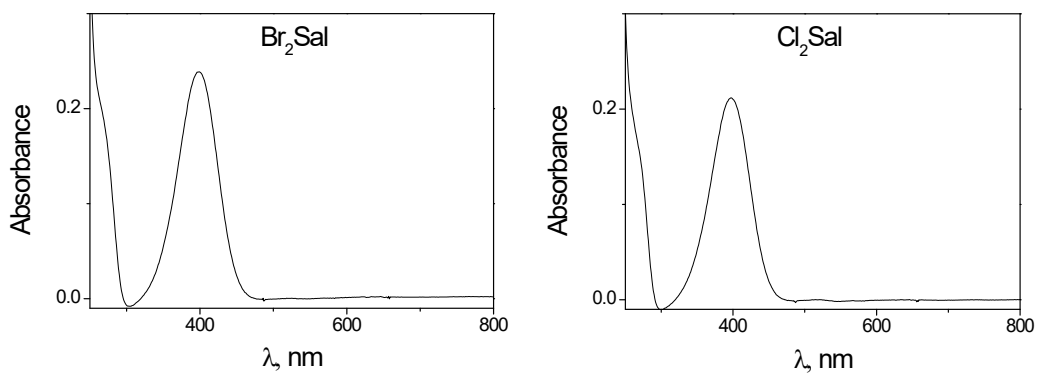

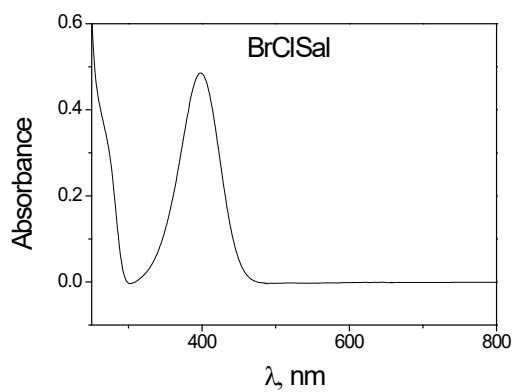

**Figure S11.** Absorbance spectra of 20  $\mu$ M of the dihalogenated ligands in buffer (2.5 mM NaCaC), pH = 7, 0.1 %DMSO and T = 25°C.

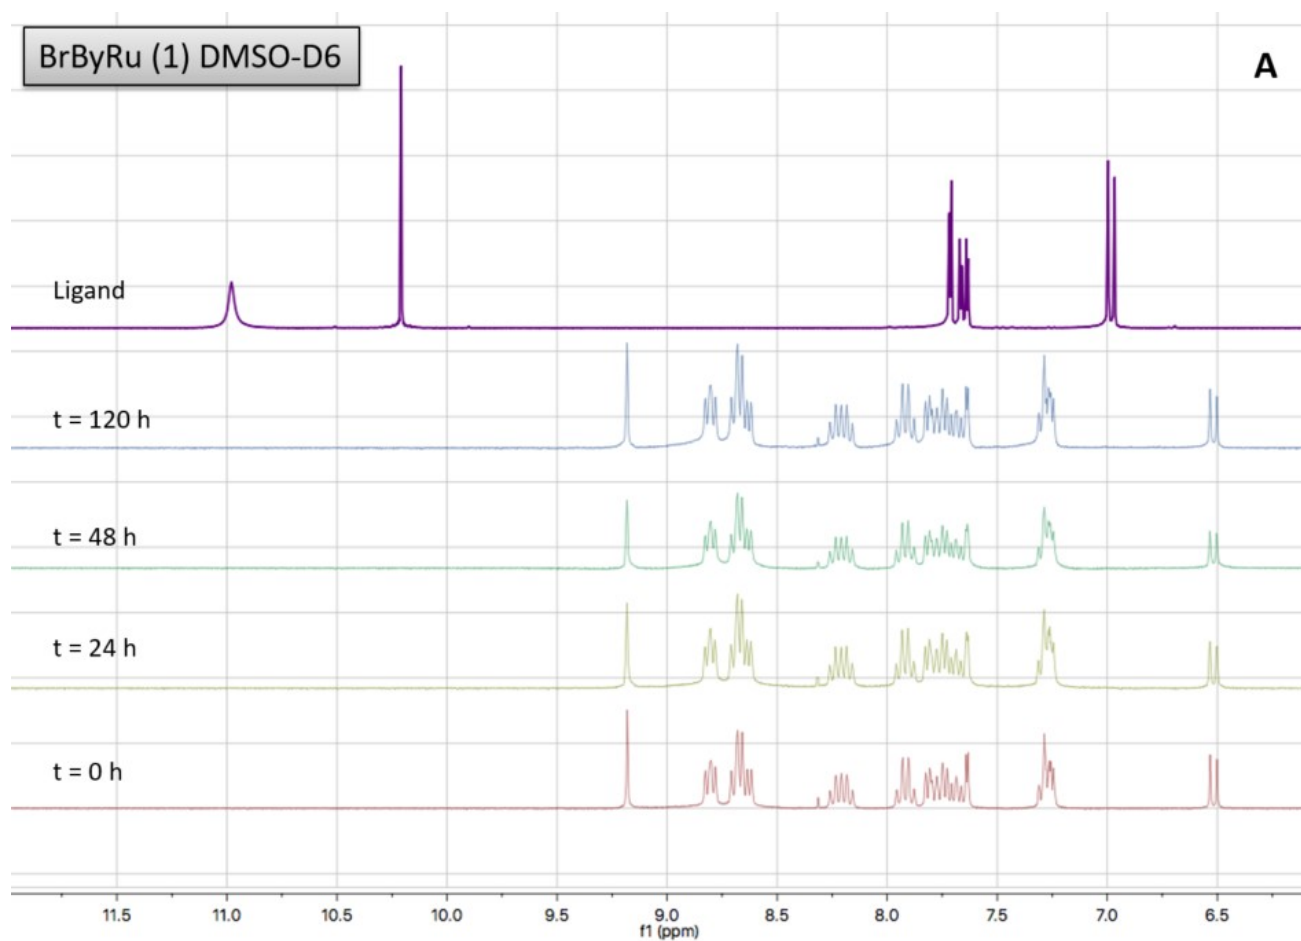

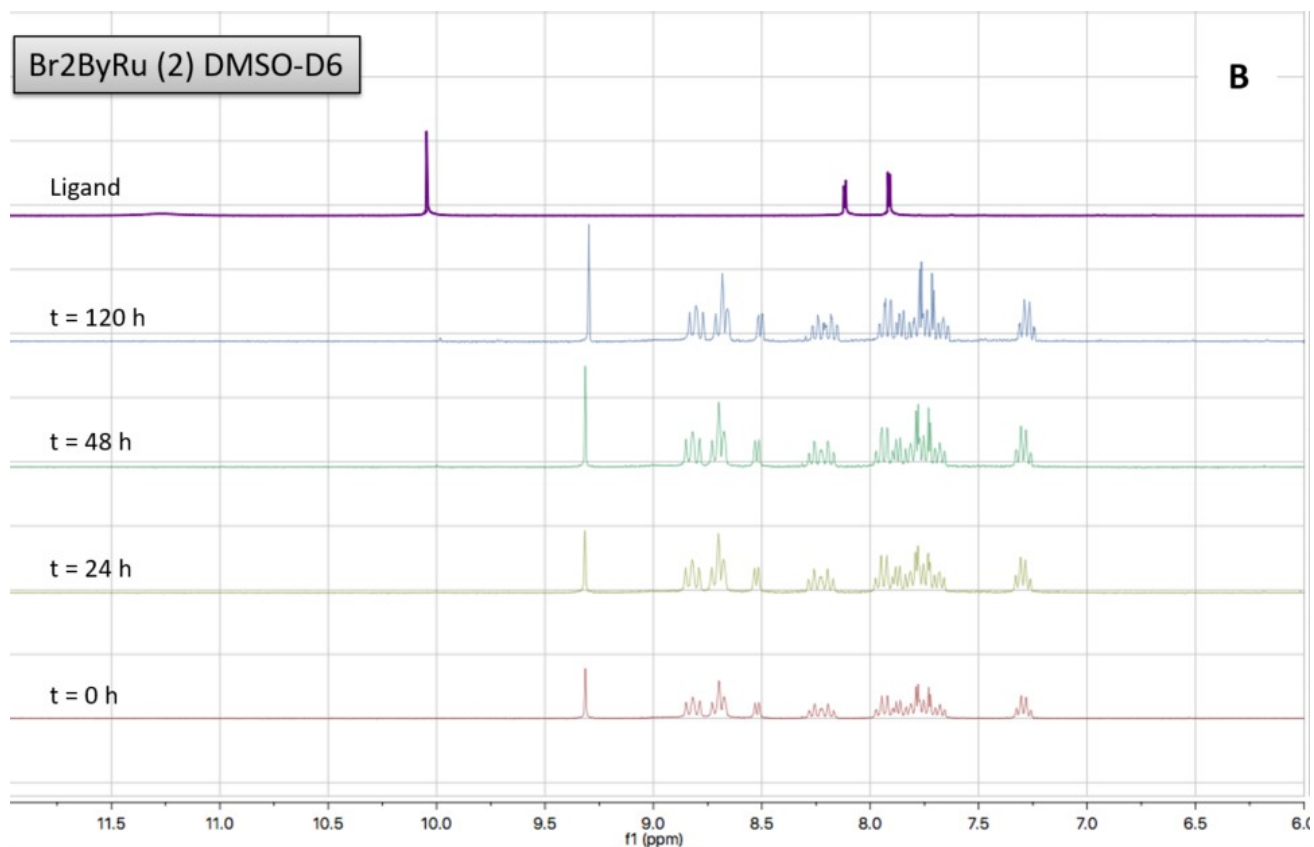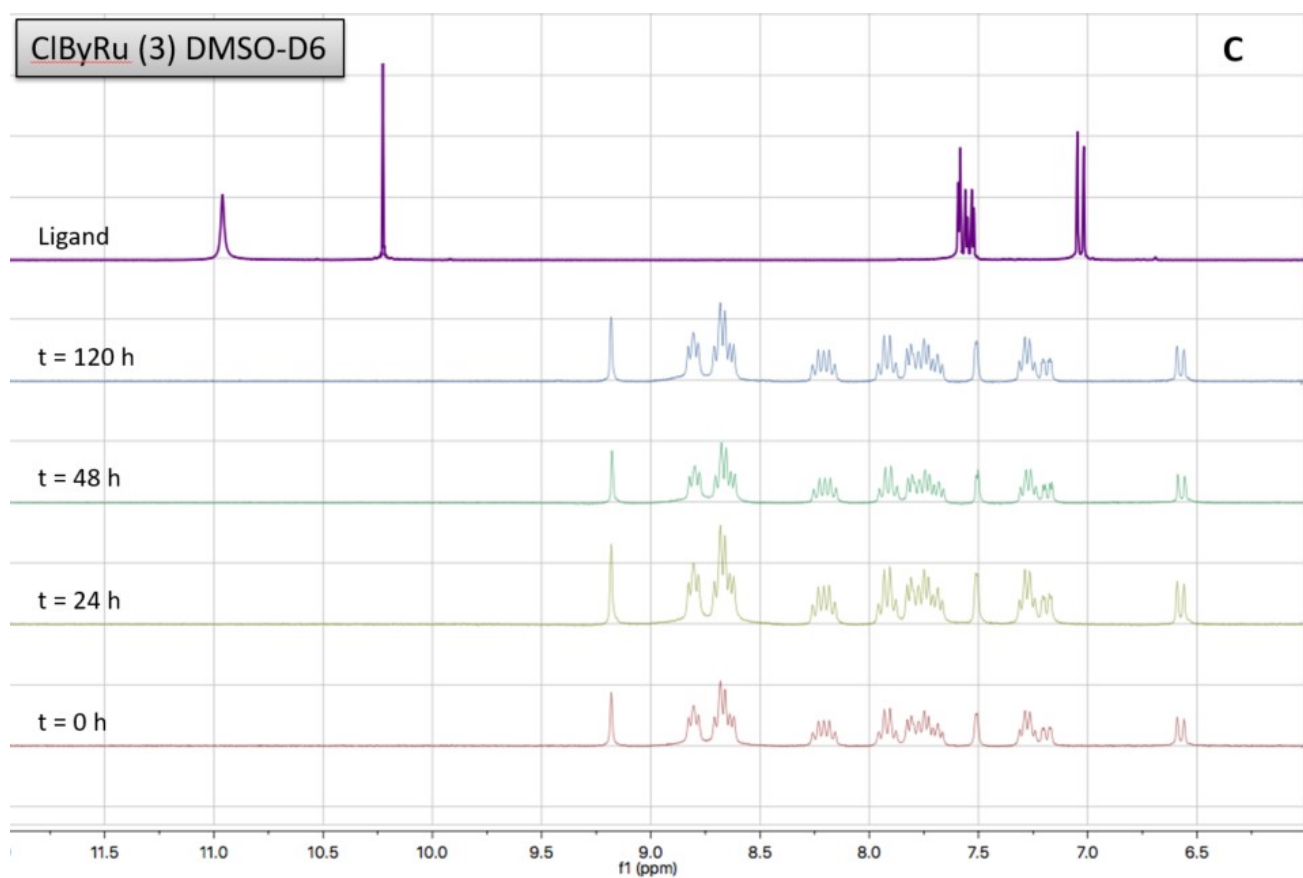



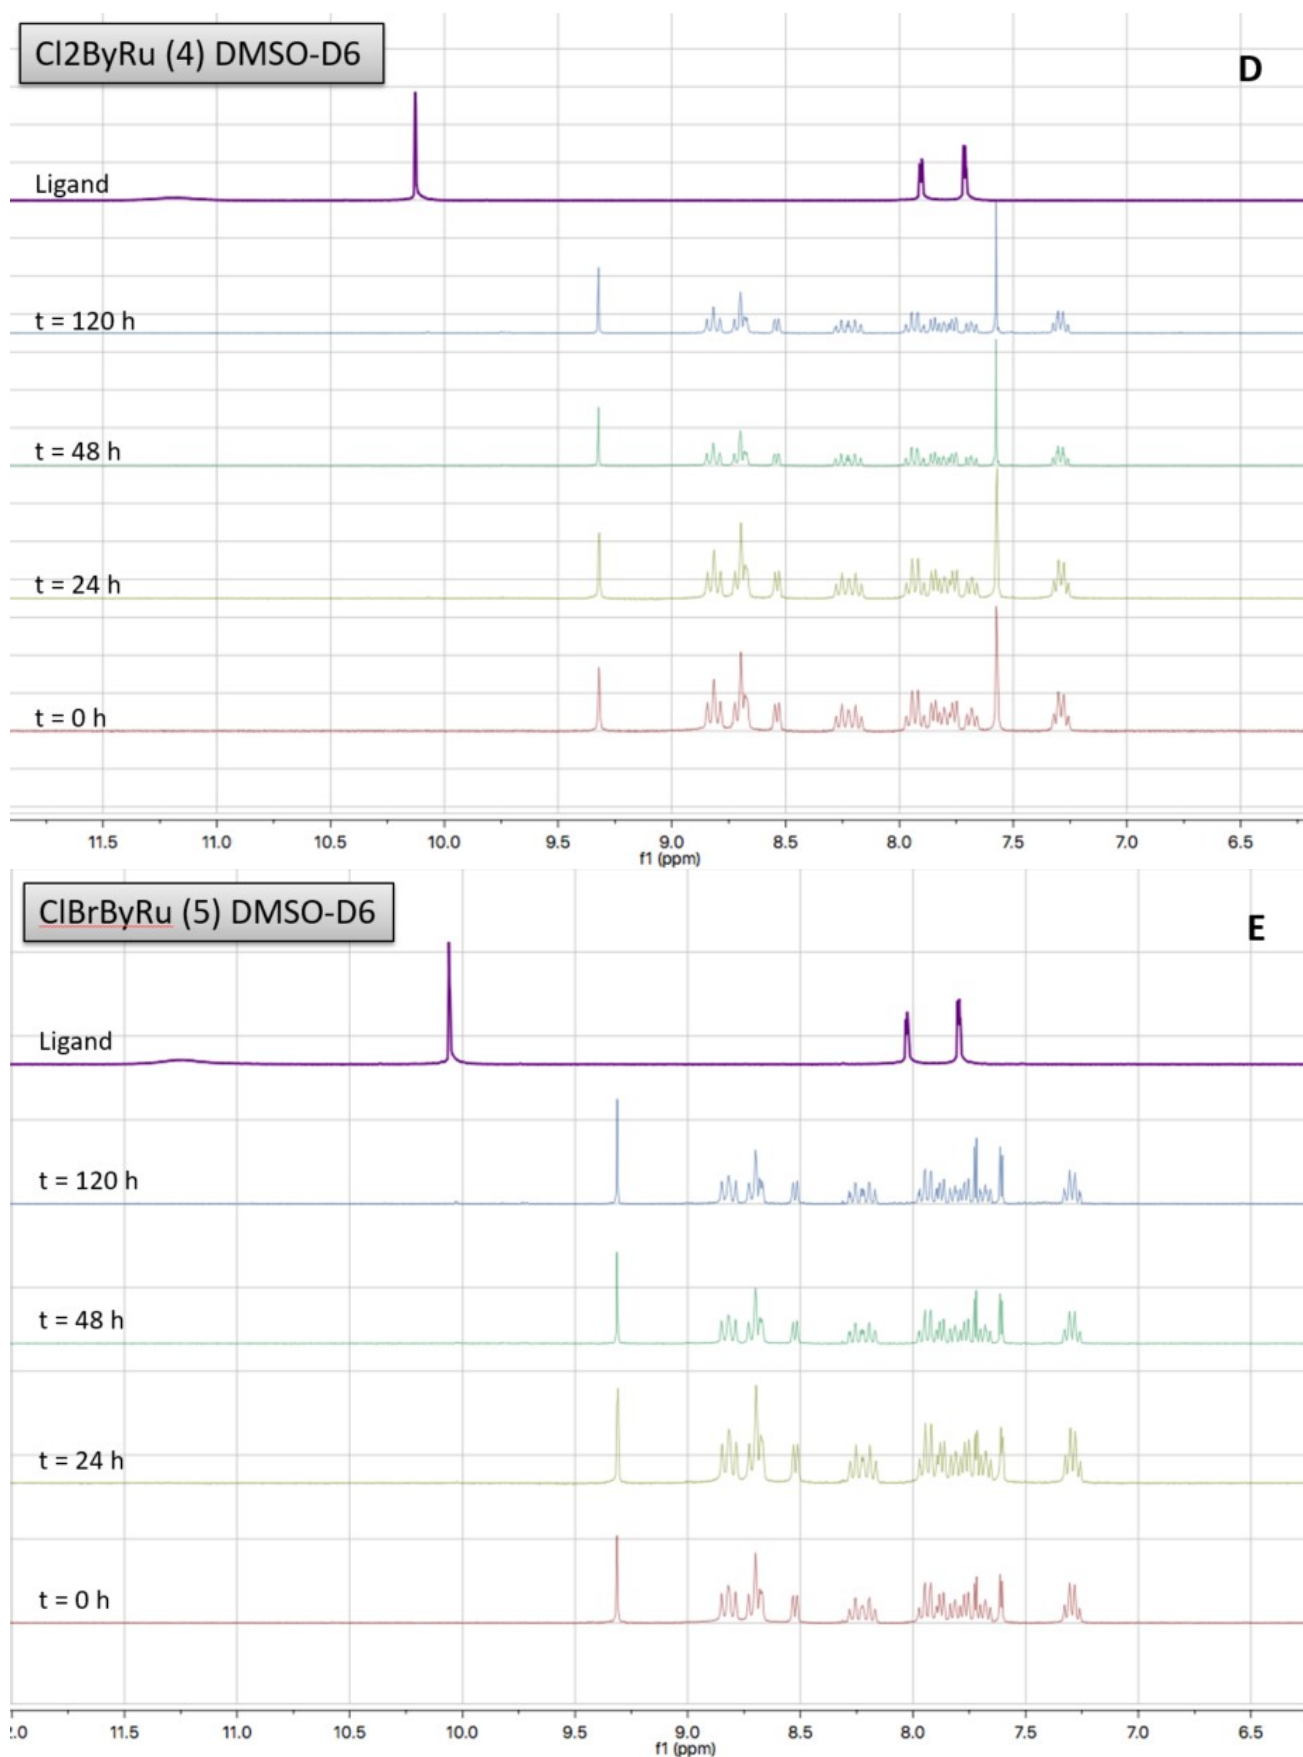

**Figure S12.** <sup>1</sup>H NMR spectra for the Ru(II) complexes in DMSO-d<sub>6</sub> recorded at different incubation times.

BrByRu (1) DMSO-D6(0.5 ml):D2O(0.1 ml)

A

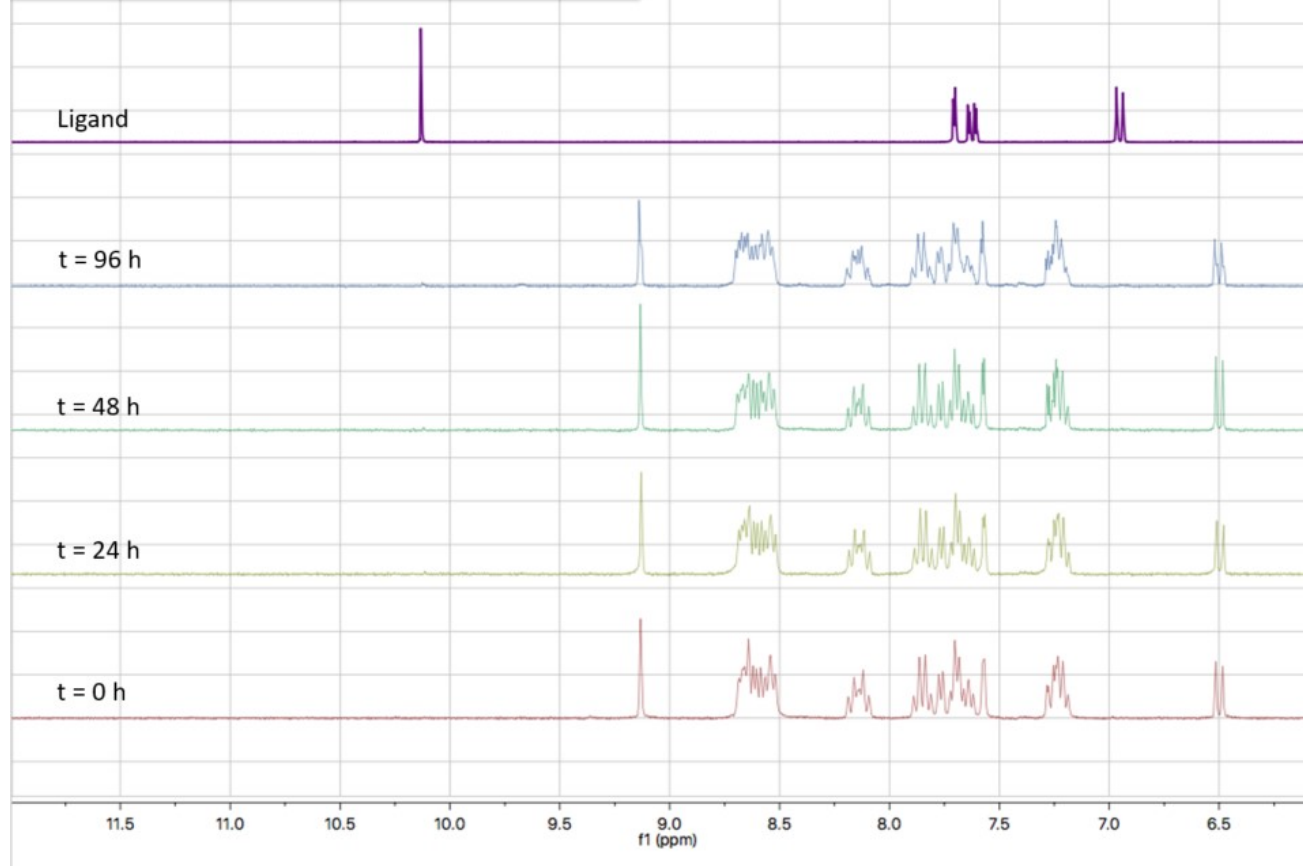

Br<sub>2</sub>ByRu (2) DMSO-D<sub>6</sub>(0.5 ml):D<sub>2</sub>O(0.1 ml)

**B**

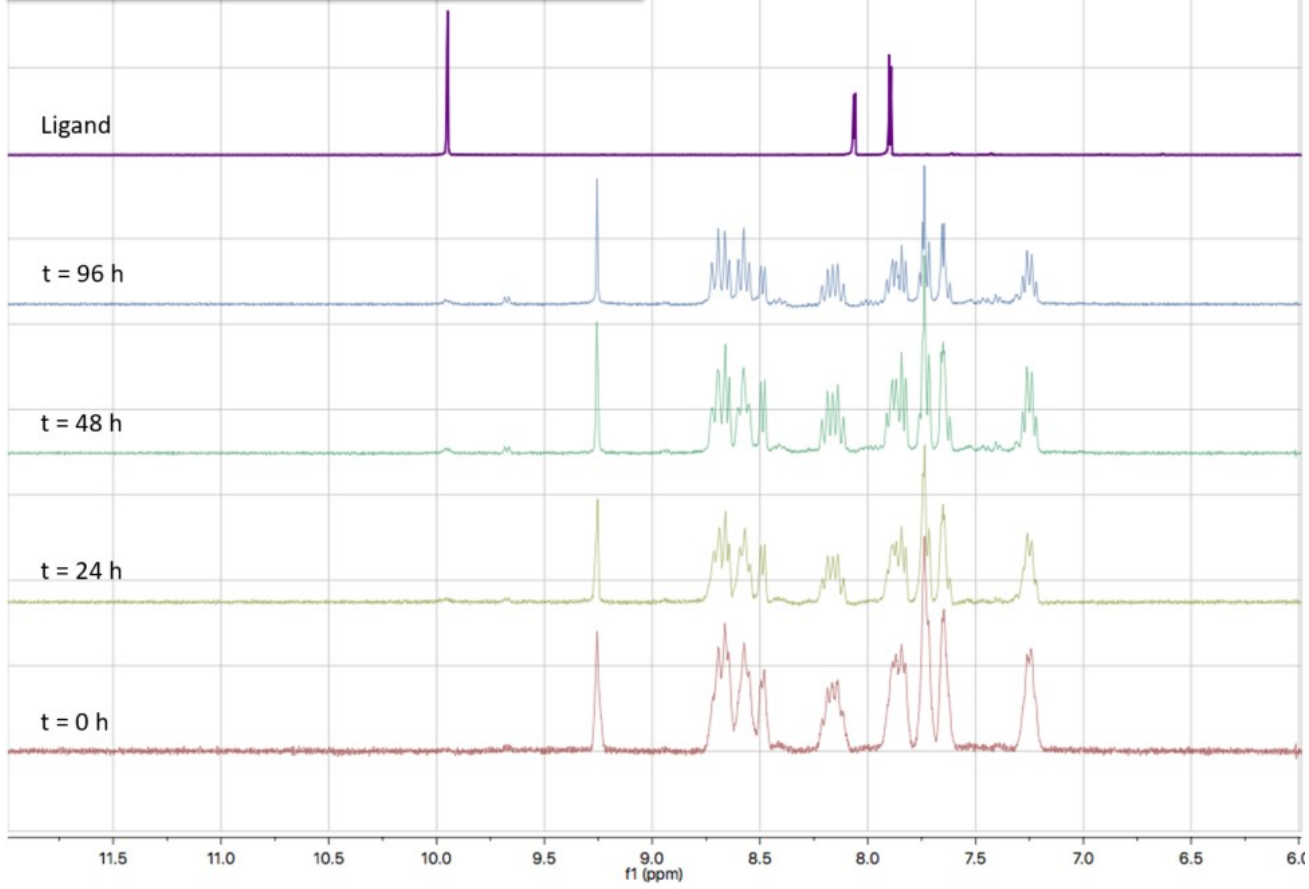

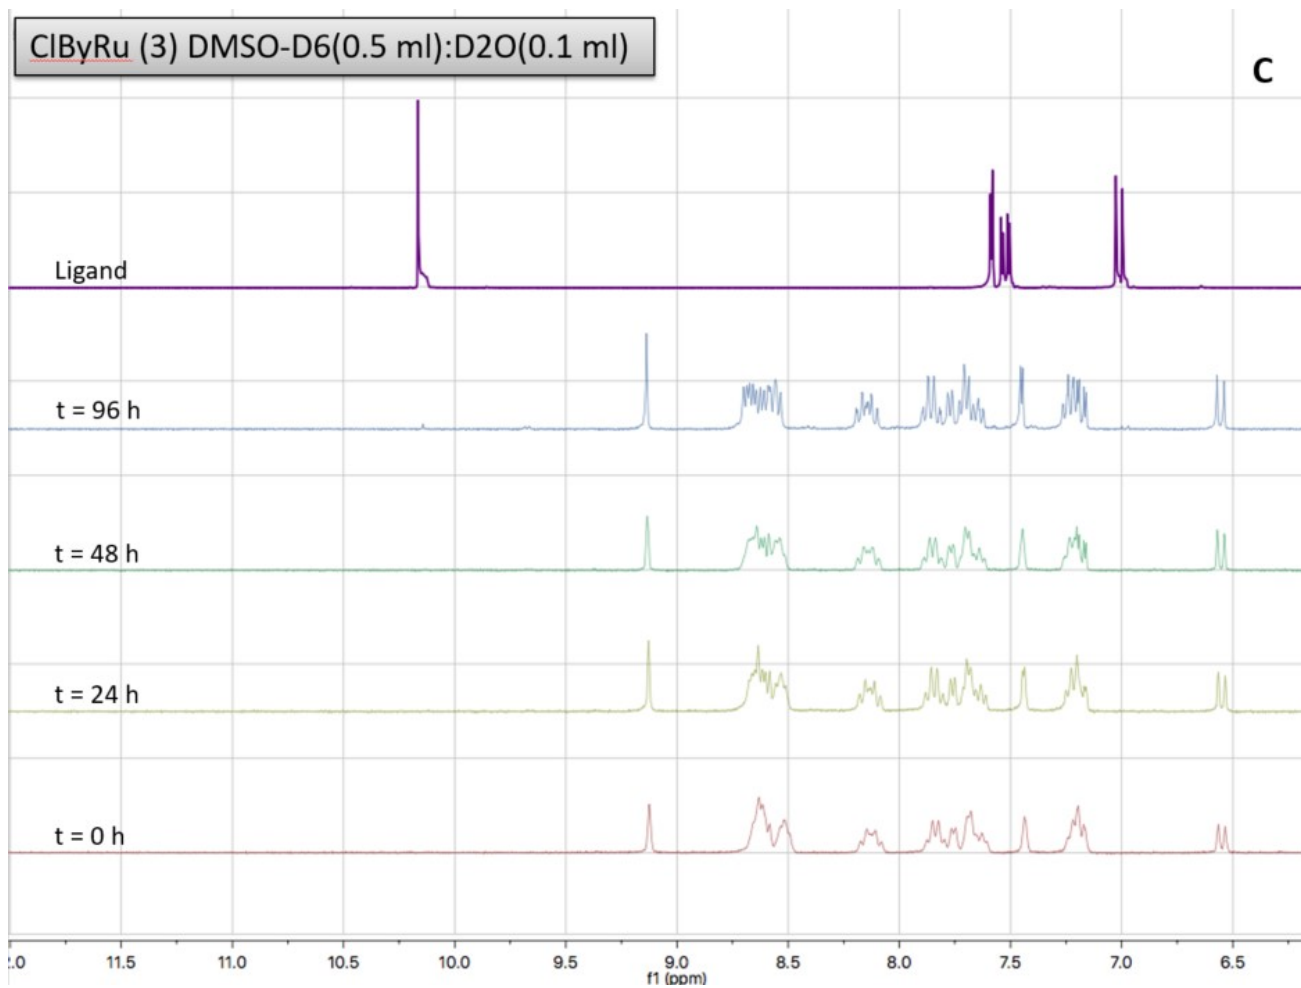

Cl<sub>2</sub>ByRu (4) DMSO-D<sub>6</sub>(0.5 ml):D<sub>2</sub>O(0.1 ml)

D

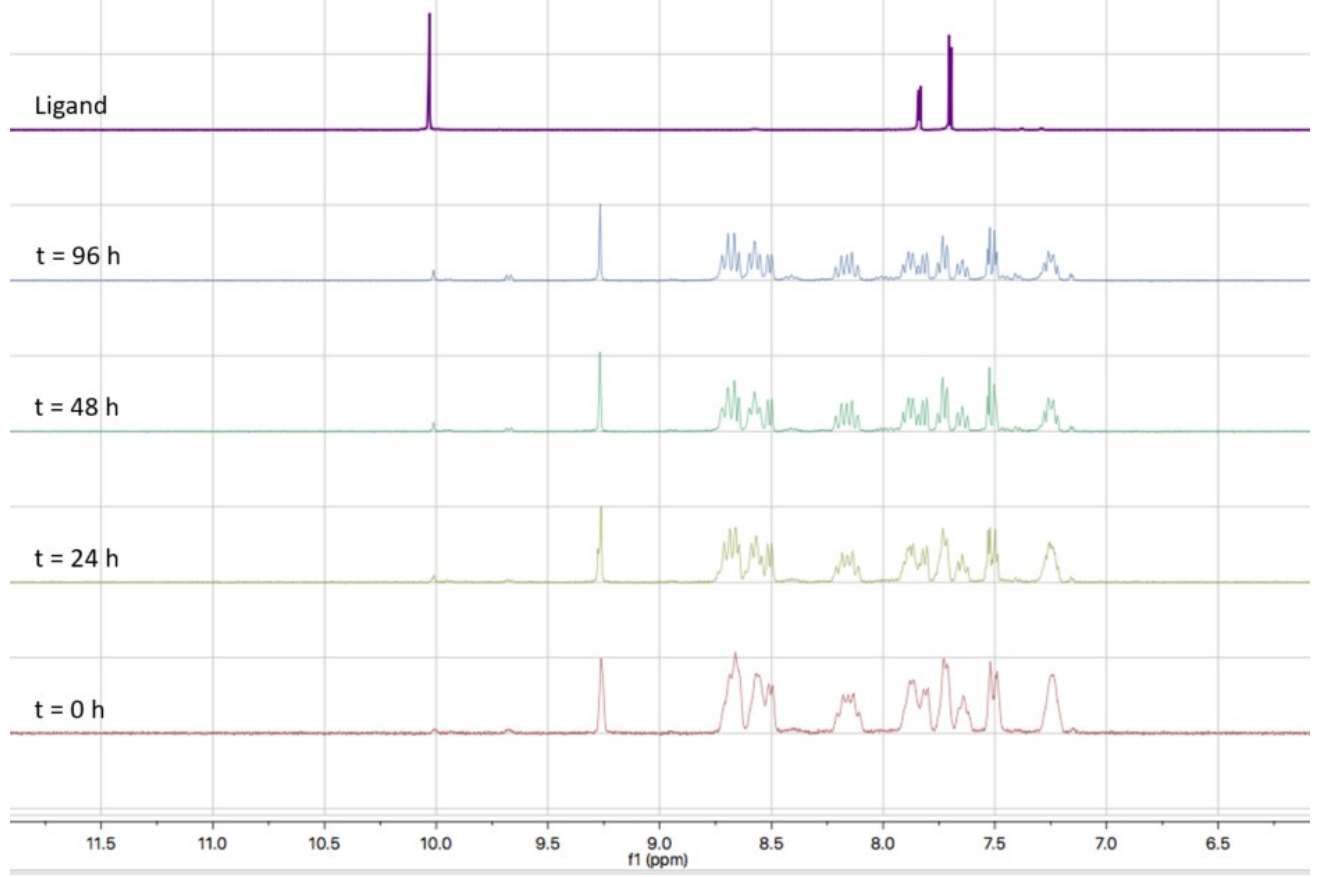

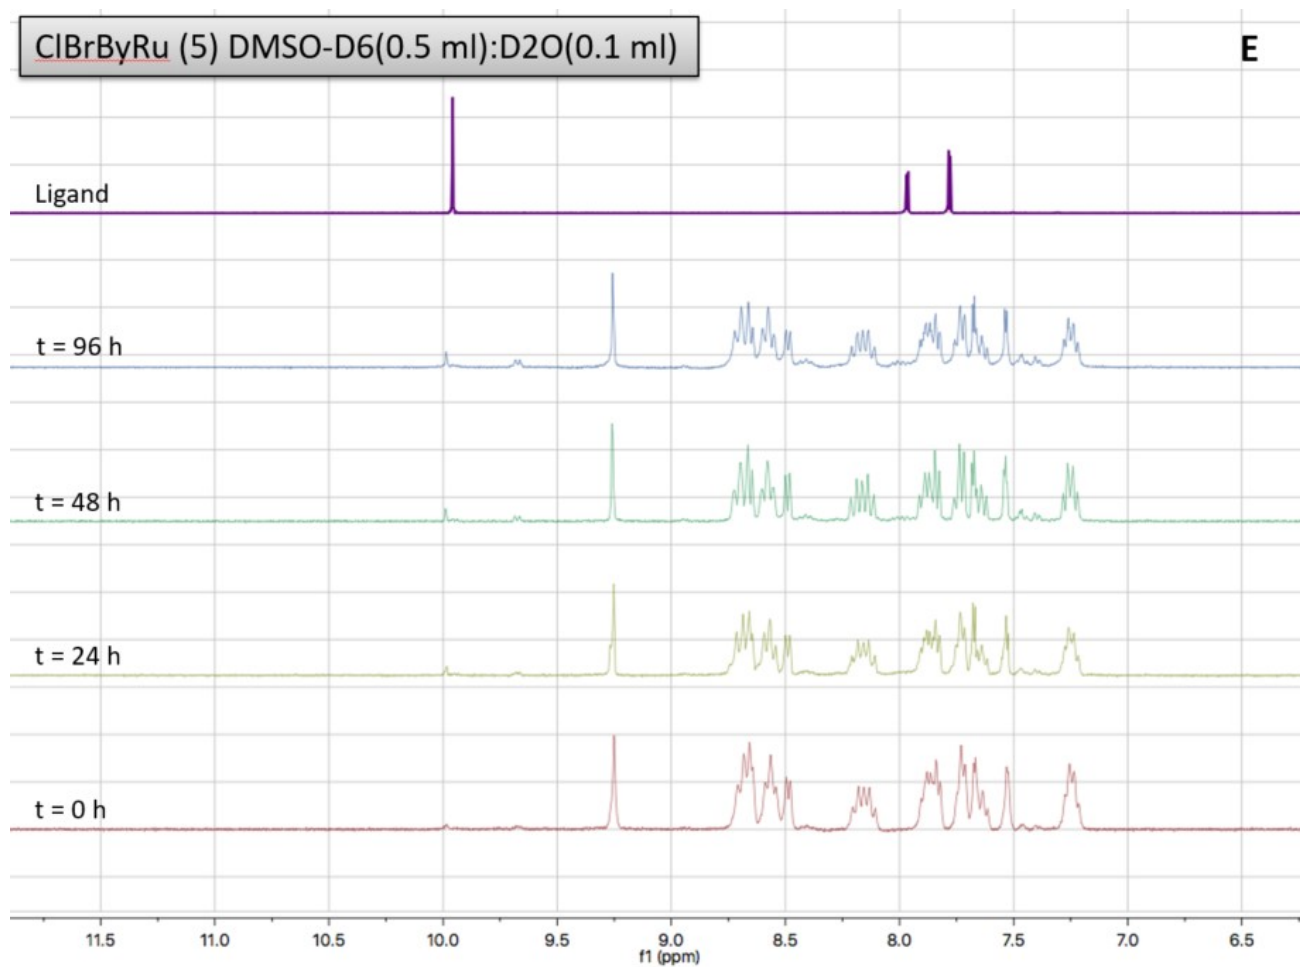

**Figure S13.** <sup>1</sup>H NMR spectra for the Ru(II) complexes in DMSO-*d*<sub>6</sub>:D<sub>2</sub>O recorded at different incubation times.

**Table S4.** MIC values of the studied compounds. Norfloxacin is included as positive control.

|                           | MIC, $\mu$ M         |                       |                     |                      |
|---------------------------|----------------------|-----------------------|---------------------|----------------------|
|                           | VR <i>E. faecium</i> | MRSA <i>S. aureus</i> | <i>A. baumannii</i> | <i>P. aeruginosa</i> |
| <b>Norfloxacin</b>        | 6.2                  | 6.2                   | 20                  | 3.1                  |
| <b>Cl-Sal</b>             | > 100                | > 100                 | > 100               | > 100                |
| <b>Br-Sal</b>             | > 100                | > 100                 | > 100               | > 100                |
| <b>Cl<sub>2</sub>-Sal</b> | 100                  | 100                   | > 100               | > 100                |
| <b>BrCl-Sal</b>           | > 100                | 100                   | > 100               | > 100                |
| <b>Br<sub>2</sub>-Sal</b> | 100                  | 50                    | > 100               | > 100                |
| <b>ByRu</b>               | > 100                | > 100                 | > 100               | > 100                |
| <b>1</b>                  | 40                   | 25                    | > 100               | > 100                |
| <b>2</b>                  | 25                   | 12.5                  | 100                 | > 100                |
| <b>3</b>                  | 100                  | 100                   | > 100               | > 100                |
| <b>4</b>                  | 25                   | 12.5                  | > 100               | > 100                |
| <b>5</b>                  | 25                   | 12.5                  | > 100               | > 100                |

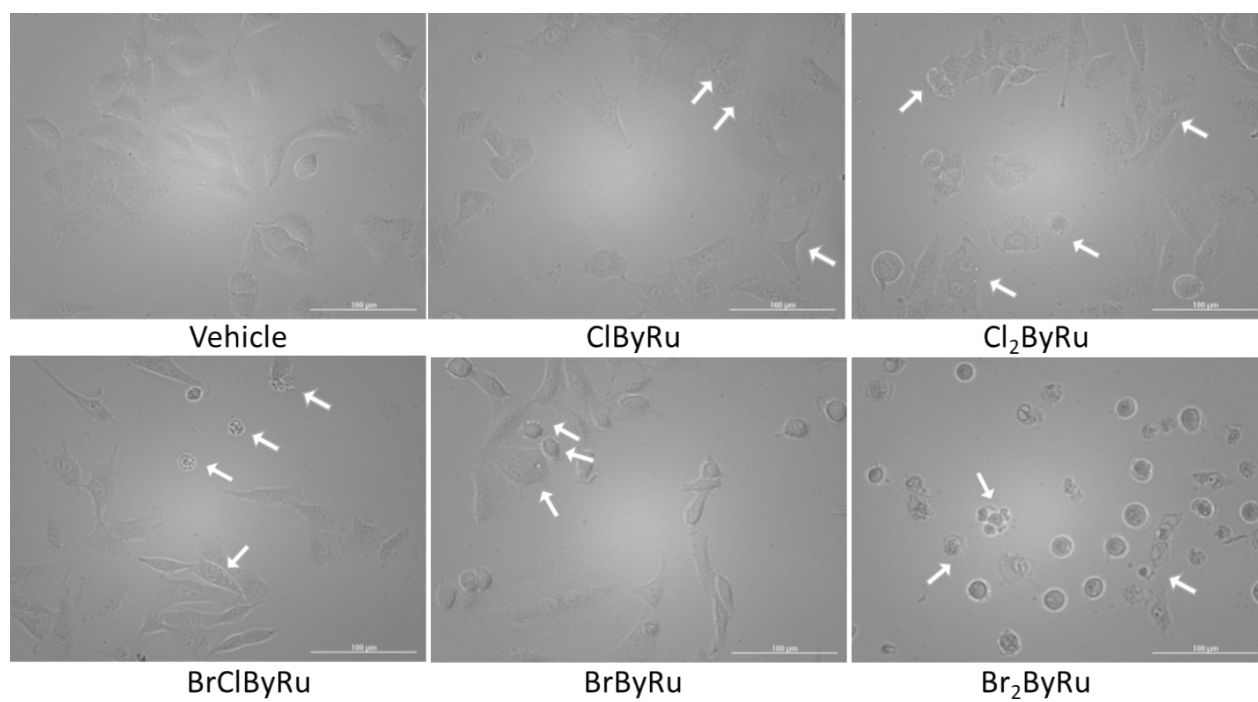

**Figure S14.** Bright Field Images of A549 cells treated with 10 µM of the Ru(II) complexes during 17h (20 × magnification). White arrows highlight apoptotic morphology.
